1       **Type-I interferon signaling is essential for robust metronomic chemo-immunogenic tumor**  
2                       **regression in murine triple-negative breast cancer**

3  
4                       Cameron Vergato<sup>1</sup>, Kshama A. Doshi<sup>1</sup>, Darren Roblyer<sup>2</sup>, David J. Waxman<sup>1,2</sup>

5                       Departments of Biology<sup>1</sup> and Biomedical Engineering<sup>2</sup>

6                       Boston University, Boston MA 02215

7  
8       **Running title:** Role of type-I interferon in TNBC chemo-immunogenic response

9  
10       **Key words:** Immunogenic cell death, IFNAR-1, medium-dose intermittent chemotherapy (MEDIC),  
11       tumor RNA-seq, 4-hydroperoxy-cyclophosphamide

12  
13       **Grant support:** US Department of Defense, award no. W81XWH-15-1-0070.

14  
15       \* **Correspondence:**

16               Dr. David J. Waxman  
17               Dept. of Biology  
18               Boston University  
19               5 Cummington Mall  
20               Boston, MA 02215  
21               Email: [djw@bu.edu](mailto:djw@bu.edu)

22  
23       **Conflict of interest:** The authors declare no potential conflicts of interest.  
24

## 25 **Abstract**

26 Triple-negative breast cancer (TNBC) is characterized by poor prognosis and aggressive growth, with  
27 limited therapeutic options for many patients. Here, we use two syngeneic mouse TNBC models, 4T1  
28 and E0771, to investigate the chemo-immunogenic potential of cyclophosphamide and the mechanistic  
29 contributions of cyclophosphamide-activated type-I interferon (IFN) signaling to therapeutic activity.  
30 Chemically-activated cyclophosphamide induced robust IFN $\alpha/\beta$  receptor-1-dependent signaling linked to  
31 hundreds of IFN-stimulated gene responses in both TNBC lines. Further, in 4T1 tumors,  
32 cyclophosphamide given on a medium-dose, 6-day intermittent metronomic schedule induced strong  
33 IFN signaling but comparatively weak immune cell infiltration associated with long-term tumor growth  
34 stasis. Induction of IFN signaling was somewhat weaker in E0771 tumors but was followed by extensive  
35 downstream gene responses, robust immune cell infiltration and prolonged tumor regression. The  
36 immune dependence of these effective anti-tumor responses was established by CD8 T-cell  
37 immunodepletion, which blocked cyclophosphamide-induced E0771 tumor regression and led to tumor  
38 stasis followed by regrowth. Strikingly, IFN $\alpha/\beta$  receptor-1 antibody blockade was even more effective in  
39 preventing E0771 immune cell infiltration and blocked the major tumor regression induced by  
40 cyclophosphamide treatment. Type-I IFN signaling is thus essential for the robust chemo-immunogenic  
41 response of these TNBC tumors to cyclophosphamide administered on a metronomic schedule.

42

## 43 **Significance**

44 TNBC has poor prognosis and few therapeutic options. We show that cyclophosphamide treatment can  
45 induces extensive tumor regression in syngeneic mouse models of TNBC via a chemo-immunogenic  
46 mechanism linked to type-I IFN production. Our findings establish that IFN signaling is essential for the  
47 robust anti-tumor actions of cyclophosphamide and suggest that treatment resistance may stem from  
48 silencing the IFN pathway. This suggests a new avenue for improving TNBC treatment efficacy.

49

50

## 51 **Introduction**

52 Triple-negative breast cancer (TNBC) is characterized by increased tumor aggression and poor  
53 prognosis compared to other breast cancer subtypes (1). TNBC is distinguished by the lack of estrogen  
54 receptor, progesterone receptor and human epidermal growth factor receptor 2 (HER2) (2), which limits  
55 treatment options. TNBC initially responds to neoadjuvant chemotherapy but often recurs and  
56 metastasizes, with poor patient prognosis. Checkpoint inhibitors are often ineffective in TNBC patients  
57 (3,4), despite a comparatively high mutational burden and elevated levels of tumor-infiltrating

58 lymphocytes (5). The discovery and preclinical development of novel therapies is thus critically  
59 important.

60 Immunogenic cell death is a unique cell death mechanism that can activate both innate and adaptive  
61 immune responses (6,7) and confer long term immunity (8). Chemotherapy-induced immunogenic cell  
62 death is characterized by damage-associated molecular pattern responses (9), including cell surface  
63 translocation of calreticulin, a pro-phagocytic signal (10), release of the toll-like receptor 4 ligand  
64 HMGB1 (11), extracellular release of ATP (12) and production of type-I interferons (IFN) (13). Dendritic  
65 cells attracted by the release of these molecules by dying tumor cells in the tumor microenvironment  
66 engulf the dead and dying tumor cells and undergo maturation (7). Immunostimulatory cytokines  
67 produced by mature dendritic cells, in turn, recruit NK cells, CD4 T-cells and CD8 T-cells, which can  
68 contribute to tumor regression and activate tumor-specific immunity (7). Several cytotoxic drugs  
69 approved for breast cancer have the potential to induce immunogenic cell death, including doxorubicin  
70 (14), epirubicin (15), mitoxantrone (7) and cyclophosphamide (CPA) (16,17).

71 Type-I IFNs, primarily IFN $\alpha$  and IFN $\beta$ , are secreted in response to viral or bacterial infection when viral  
72 gene products or bacterial cell wall components are detected by toll-like receptors or by cytosolic  
73 sensors of specific nucleic acids (18). Type-I IFNs bind to the heterodimeric IFN  $\alpha/\beta$  receptor (IFNAR),  
74 which in turn activates a signaling cascade leading to increased expression of many interferon-  
75 stimulated-genes (ISGs). These ISGs have diverse immunomodulatory effects, including immune cell  
76 recruitment, type-2 IFN production and immune cell activation (18), opening up many novel interferon-  
77 based therapeutic opportunities for cancer treatment (19). Type-I IFN signaling supports tumor cell  
78 immunosurveillance (20) and impacts the efficacy of certain anti-cancer therapies, including antibodies  
79 against HER2, anthracyclines, checkpoint inhibitors, and lenalidomide (21).

80 In murine glioma models, CPA can induce immunogenic cell death when administered on a metronomic,  
81 medium-dose intermittent chemotherapy (MEDIC) schedule (22,23), leading to elimination of GL261  
82 gliomas implanted in syngeneic mice and activation of long-term anti-tumor immunity (24). Other CPA  
83 treatment schedules are much less effective at inducing immune cell recruitment in glioma models (25),  
84 a finding that was recently validated in breast cancer models (26). CPA given on a MEDIC schedule  
85 activates tumor cell autonomous type-I IFN signaling required for CPA-induced immune cell infiltration  
86 (17), suggesting cytotoxic drug-induced type-I IFN production may serve as a biomarker for the  
87 immunogenic potential of cancer cells. However, it is not known whether, and to what extent, IFN-  
88 stimulated immune cell recruitment contributes to the tumor regression induced by MEDIC CPA  
89 treatment.

90 Here, we investigate the immunogenic potential of CPA in two TNBC tumor models: 4T1, a Balb/c  
91 mouse syngeneic mammary carcinoma model for metastatic late-stage breast cancer (27); and E0771,  
92 a medullary breast adenocarcinoma formed spontaneously in C57BL/6 mice (28) and model for

93 spontaneous breast cancer (29). Orthotopic E0771 tumors undergo CD8 T-cell-dependent tumor  
94 regression with specific anti-tumor immunity when treated with doxorubicin combined with interleukin-2  
95 (30), but immune-based tumor regression induced by chemotherapy alone, including MEDIC scheduling  
96 of CPA (22,23), has not been reported for either TNBC model.

97 We assay these TNBC lines for their capacity to mount an interferon response, as indicated by robust  
98 interferon-stimulated-gene (ISGs) induction following *in vitro* treatment with 4HC or doxorubicin, and we  
99 assess the dependence on IFN $\alpha$ / $\beta$  receptor-1 (IFNAR-1) signaling. Further, we investigate the impact of  
100 CPA administered on a MEDIC metronomic schedule on TNBC tumors implanted orthotopically in  
101 syngeneic mice. Our findings reveal a striking immunogenic response to CPA associated with increased  
102 expression of hundreds of genes, including many ISGs, and resulting in the near complete regression of  
103 E0771 tumors in a manner that is absolutely dependent on the activation of type-I IFN signaling-  
104 supported immune cell recruitment.

105

## 106 **Materials and Methods**

107 Tumor cell lines - Cell lines were authenticated by and obtained from CH3 BioSystems (Amherst, NY)  
108 (E0771, cat. #94A001) and American Type Culture Collection (Manassas, VA) (4T1 cells, cat. #CRL-  
109 2539; B16F10 cells, cat. #CRL-6475). Typically, cell lines were propagated in culture for fewer than 6-8  
110 passages before cells were discarded and a fresh, early passage cell vial was thawed and used for  
111 experimentation. Cells were cultured in RPMI-1640 (4T1, E0771) or DMEM (B16F10) medium, 10%  
112 fetal bovine serum (FBS) and 1% penicillin-streptomycin at 37°C under a humidified 5% CO<sub>2</sub>  
113 atmosphere. Cells were stained with 0.4% trypan blue and counted using a Countess Automated Cell  
114 Counter (Thermo-Fisher Scientific).

115 Cytotoxicity/chemosensitivity (MTS) assay - Cells were seeded in 96-well plates, (cat. #10861-666,  
116 VWR, Radnor, PA) at 3,000 cells per well, 1 day prior to treatment with 10<sup>-9</sup> M to 10<sup>-4</sup> M chemically  
117 activated CPA (4-hydroperoxy-CPA, 4HC; cat. # 19527, Cayman Chemical, Ann Arbor, MI) or  
118 doxorubicin (cat. #D1515 Sigma-Aldrich) for 4 h. Cells were then washed once with PBS (cat.  
119 #BP24384, Fisher Scientific), cultured for 68 h in drug-free media. MTS reagent (10  $\mu$ l; cat. # G5421,  
120 Promega, Madison, WI) then incubated at 37°C to assay cell viability. A<sub>490</sub> was measured every 30 min  
121 (Synergy H1 plate reader; BioTek Instruments, Winooski, VT), and the time-point where untreated cells  
122 reached A<sub>490</sub> = 1.0 was used to generate dose-response viability curves and calculate IC<sub>50</sub> values by  
123 non-linear curve fitting implemented in GraphPad Prism 8.

124 In vitro drug treatment - Cells were treated for 4 h with 4HC or doxorubicin at IC<sub>50</sub>-range drug  
125 concentrations using cells seeded the prior day at 50,000 (E0771) or 75,000 cells per well (4T1,  
126 B16F10) of a 6-well plate (cat. #10861-696, VWR). Cells were then washed once with PBS and

127 incubated in fresh media for a total of 24, 48 and 72 h after the start of drug treatment, at which time  
128 RNA was isolated.

129 RNA isolation and quantitative PCR (qPCR) – TRIzol™ Reagent (1 ml; cat. # 15596018, Invitrogen,  
130 Carlsbad, CA) was used to extract RNA from ~30-200 mg frozen tumor tissue or from cells in one well of  
131 a 6-well plate. RNA was resuspended in ultrapure water and quantified (BioTek Synergy H1 plate reader  
132 or Qubit™ 3.0 Fluorometer) (cat. #15387293, Fisher Scientific). RNA (1 µg) was treated with RNase-free  
133 RQ1 DNase 1 (cat. # M6101, Promega) with a murine RNase inhibitor (cat. #M0314, New England  
134 Biolabs) followed by cDNA synthesis using a High-Capacity cDNA Reverse Transcription kit (cat. #  
135 466814, Applied Biosystems, Foster City, CA). qPCR was performed on cDNA samples using *Power*  
136 SYBR™ Green PCR Master Mix (cat. # 4367659, Applied Biosystems), gene-specific primers (Table S1)  
137 (Eton Bioscience, San Diego, CA) and a BioRad CFX384 Touch™ Real-Time PCR Detection System.  
138 Data for mouse ISGs (Mx1, Cxcl10, Oasl1, Cxcl11, Igtf, RSAD2) and immune marker genes (Cd8α,  
139 Nkp46, Cd68, Ifng, Prf1, Gzmb, Cd11b and Foxp3) was analyzed by the comparative Ct method. Gene  
140 expression, normalized to 18S RNA content, was presented relative to untreated cells for *in vitro*  
141 samples, or to placebo group for *in vivo* tumor samples. Target gene primers pairs were designed to  
142 span two adjacent exons, to be 18-22 bp long with close to 50% G:C content, and to form amplicons 50-  
143 150 bp long. Unique primer specificity was verified by extending each primer sequence by 3, 5, 10, 15  
144 and 20 nucleotides and then using the UCSC Genome Browser BLAST-like alignment tool (BLAT) to  
145 confirm a single correct target. Data for culture experiments is presented as mean +/- standard deviation  
146 (SD) with n = 2-3 replicate samples. Mouse experiments are presented as mean +/- standard error of  
147 the mean (SEM) for n tumors, as indicated. qPCR primer sequences are shown in Fig. S8.

148 *In vitro* interferon-β (IFNβ) treatment – Cells seeded in 6-well plates at 200,000 cells per well were  
149 incubated overnight, then treated with recombinant mouse IFNβ1 (cat. # 581302, BioLegend, San  
150 Diego, CA) at 28, 83 or 250 U/mL for 4 h. Cells were then washed with PBS, fresh media was replaced,  
151 and cells were harvested 2 h later for RNA isolation.

152 poly (I:C) transfection – Cells were transfected with 1 µg/mL poly (I:C) (cat. # tlr1-picw, InVivogen, San  
153 Diego, CA) using 6 µg/mL poly-ethylenimine. Cells were seeded overnight in 6-well plates at 50,000  
154 cells/well for E0771 cells and 75,000 cells/well for 4T1 and B16F10 cells. The next day, poly (I:C) (2 µL  
155 of 1 mg/mL per well) was mixed with 12 µL of 1 mg/mL poly-ethylenimine and 100 µL of serum-free  
156 media and incubated at room temperature for 15 min. This solution was added to 1.89 mL of full media  
157 and placed in one well of a 6-well plate for 4 h. Cells were then washed with PBS, followed by addition  
158 of fresh media. Cells were collected 20 h later for RNA isolation.

159 *In vitro* interferon receptor antibody treatment - Cells were treated with 10 µg/mL monoclonal anti-mouse  
160 IFNα/β receptor subunit 1 (IFNAR-1) antibody (clone MAR1-5A3, BioXCell, West Lebanon, NH), which  
161 was added to the cells together with 4HC, doxorubicin, IFNβ or poly (I:C), for 4 h, as above. The media

162 was removed, and the cells were washed once in PBS before adding fresh media containing 10 µg/mL  
163 IFNAR-1 antibody for an additional 2 h to 70 h prior to harvesting for RNA isolation.

164 Conditioned media treatment - 4T1 and E0771 cells were treated with 4HC (5 µM and 4.2 µM,  
165 respectively) as described above and harvested 72 h later. Conditioned media was collected from these  
166 donor cells, transferred to drug-free (naïve) recipient cells seeded overnight in 6-well plates, and  
167 incubated for 4 h. Cells were washed with PBS followed by replacement with fresh media prior to  
168 isolation of RNA from the recipient cells 2 h later.

169 Mouse studies: tumor inoculation and CPA treatment - Mice were treated using protocols specifically  
170 reviewed for ethics and approved by the Boston University Institutional Animal Care and Use Committee  
171 (protocol # PROTO201800698), and in compliance with ARRIVE 2.0 Essential 10 guidelines (31),  
172 including study design, sample size, randomization, experimental animals and procedures, and  
173 statistical methods. 6-week-old female BALB/c mice (Taconic Farms, Germantown, NY) and female  
174 C57/BL6N mice (Taconic Farms) were purchased as indicated. 4T1 cells ( $1 \times 10^5$ ) or E0771 cells ( $2 \times$   
175  $10^5$ ) resuspended in 0.1 ml PBS were inoculated into the fourth mammary fat pad of BALB/c and  
176 C57/BL6N mice, respectively, using a 1 mL syringe (cat. #309628, BD Biosciences) with a 5/8-inch-long  
177 26-gauge needle (cat. #305115, BD Biosciences, San Jose, CA). Tumor length and width were  
178 monitored every 3 d using a vernier caliper, and tumor volumes were calculated:  $\text{Volume} = (\pi/6) \times (L \times$   
179  $W)^{3/2}$ . Mice were randomized into treatment and placebo groups when average volumes reached 100-  
180 150 mm<sup>3</sup> (4T1) or 200-250 mm<sup>3</sup> (E0771). CPA (cat. # C0768, Sigma-Aldrich, St. Louis, MO) dissolved in  
181 sterile PBS and passed through a 0.2 µm filter was then injected i.p. at 0 (vehicle control), 90, 110 or  
182 130 mg/kg, as indicated. CPA injections were repeated every 6 days. Mice were euthanized at specified  
183 time points. Tumors were excised, washed with PBS and flash-frozen in liquid nitrogen after placing  
184 ~1/3 piece of fresh tumor in 1 mL TRIzol for immediate downstream use, as required.

185 Immunodepletion studies – To deplete CD8 T-cells, 0.28 mg of anti-mouse CD8α antibody (clone 53-  
186 6.7, cat. #BE0004-1, BioXCell) or rat IgG (cat. #I4131, Sigma-Aldrich), was diluted in 0.1 ml sterile PBS  
187 then given to mice by IP injection repeated on days -5, -1, 3, 9 and 15 (c.f., 110 mg/kg CPA treatment  
188 beginning on day 0). To achieve IFNAR-1 blockade, anti-mouse IFNAR-1 antibody or mouse IgG (cat.  
189 #MS-GF-ED, Molecular Innovations, Novi, MI) diluted in sterile PBS and injected i.p. (as above) as  
190 follows: 1.0 mg on day -1, 0.5 mg on day 0, and 0.25 mg on days 3, 6, 9 and 12, with 110 mg/kg CPA  
191 treatment every 6 days, beginning on day 0.

192 Fluorescence-activated cell sorting (FACS) of tumor and blood samples – Approximately 1/3 of each  
193 freshly harvested tumor was dissociated to generate a 0.5 ml single-cell suspension using a Miltenyi  
194 Biotec gentleMACS™ Dissociator (cat. #130-093-235,) C-tubes (cat. #130-093-237) and Mouse Tumor  
195 Dissociation Kit (cat. #130-096-730) by using the manufacturer's instructions for "tough" tumor samples.  
196 Mouse blood obtained by tail-vein blood collection (20 µL) was placed in a 1.5 mL microcentrifuge tube



197 with 5  $\mu$ L of 1000 U/mL heparin sodium (cat. #H3393, Sigma Aldrich) in 0.9% saline. 1 mL of 1X RBC  
198 Lysis Buffer (cat. #00-4333-57, Thermo-Fisher Scientific) was then added to 25  $\mu$ L of each sample  
199 (dissociated tumor samples or blood samples) and shaken for 20 min at 20°C to destroy red blood cells.  
200 Cells were then washed with 2 mL PBS and centrifuged at 400 x g for 5 min, followed by a second wash  
201 with 3 mL Protein Extraction Buffer (PEB: 0.5% BSA, 2 mM EDTA in PBS, pH 7.2). The cells were spun  
202 at 400 x g spin for 5 min and resuspended in 200  $\mu$ L of PEB. 100  $\mu$ L was removed, mixed with 2  $\mu$ L of  
203 anti-mouse CD16/CD32 antibody (cat. #14-0161-85, Thermo-Fisher Scientific), and incubated at 4°C for  
204 20 min to block nonspecific IgG binding. Anti-mouse CD8 $\alpha$ -APC antibody (0.7  $\mu$ L; cat. #20-1886, Clone  
205 2.43, Tonbo Biosciences, San Diego, CA) was added then incubated for 10 min at 4°C. Cells were then  
206 washed with 3 mL of PEB, spun for 5 min at 400 x g and resuspended in 200  $\mu$ L PEB. Propidium iodide  
207 (cat. #P3566, Thermo-Fisher Scientific) was added (20 ng/mL, final concentration), followed immediately  
208 by processing on a BD Biosciences FACSCalibur instrument (cat. #342975) and analysis using BD  
209 CellQuest Pro Software (BD Biosciences). Counted events were first gated by size based on forward  
210 scattering and side scattering parameters to omit very large and very small events. The next gate  
211 separated living from dead cells by excluding events with a propidium iodide signal. CD8 $\alpha$ <sup>+</sup> cells were  
212 then counted by excluding events lacking an APC signal. CD8 $\alpha$ <sup>+</sup> cells were presented as a percentage  
213 of total live cells.

214 RNA-seq library preparation and sequence analysis - Polyadenylated mRNA was isolated from 1  $\mu$ g of  
215 total RNA from cultured tumor cells or excised tumor tissue using NEBNext<sup>®</sup> Poly(A) mRNA Magnetic  
216 Isolation Module (cat. #E7490, New England Biolabs) and the manufacturer's instructions. The resulting  
217 polyA-selected RNA was used to prepare RNA-seq libraries using the NEBNext<sup>®</sup> Ultra<sup>™</sup> II Directional  
218 RNA Library Prep Kit for Illumina<sup>®</sup> (cat. #E7600, New England Biolabs), NEBNext<sup>®</sup> Multiplex Oligos for  
219 Illumina<sup>®</sup> Dual Index Primers Set 1 (cat. #E7600, New England Biolabs), and AMPure<sup>®</sup> XP Beads (cat.  
220 #A63881, Beckman Coulter Inc., Indianapolis, IN) per the manufacturer's instructions. Cell culture-  
221 derived RNA-seq libraries were prepared for n=3 independent cultures for each condition tested, except  
222 for vehicle control-treated 4T1 cells, where n=2. Tumor-derived RNA-seq libraries were prepared for  
223 n=2-3 independent pools for tumor-extracted RNA for each condition tested, with each pool prepared  
224 from n=2-3 independent biological replicate tumors. Libraries were multiplexed and sequenced by  
225 Novogene, Inc (Sacramento, CA) to an average depth of 28 million (cell culture libraries) or 13 million  
226 (tumor-derived libraries) paired-end sequence reads each (Table S3). Data was analyzed using an in-  
227 house custom RNA-seq pipeline (32), using edgeR (33) to identify differentially expressed genes for  
228 each indicated comparison, using the following cutoffs: p-value < 0.05, |fold-change| > 2.0, and  
229 fragments per kilobase per million reads (FPKM) > 0.5-1.0, as specified. Gene lists were input into the  
230 DAVID Bioinformatics Database's Functional Annotation Clustering Tool  
231 (<https://david.abcc.ncifcrf.gov/home.jsp>) to identify functional enrichment clusters with significance

232 scores for each gene list. Data are presented for the top enriched term for each of the top three clusters,  
233 along with their Benjamini-Hochberg adjusted p-values.

234

235 Data availability - The data generated in this study are available within the article and its supplementary  
236 data files. High throughput sequencing data (Fastq files and processed data files) are available for  
237 download from Gene Expression Omnibus (GEO) (<https://www.ncbi.nlm.nih.gov/geo/>) at accession #  
238 GSEX.

239

## 240 **Results**

241 4HC induces a type-I IFN response in breast cancer lines. 4T1 and E0771 breast cancer cells were  
242 treated with 4HC, an activated CPA metabolite (34), or with doxorubicin, an established  
243 immunostimulatory chemotherapeutic drug (7,14). Drug exposures were for 4 h (t = 0 to 4 h) using IC<sub>50</sub>-  
244 range drug concentrations (Fig. S1) to mimic *in vivo* exposure to the activated CPA metabolite 4-  
245 hydroxy-CPA, which is >90% cleared from mouse circulation within 4-h of CPA dosing (35). Total  
246 cellular RNA was extracted and assayed for changes in the expression of several ISGs. 4HC induced  
247 strong increases in all three ISGs examined after a 24-48-h lag, with responses being stronger in E0771  
248 cells than 4T1 cells (Fig. 1B vs. Fig. 1A). ISG responses to doxorubicin were stronger than responses to  
249 4HC in E0771 cells but were weaker in 4T1 cells. ISG induction was also observed when culture  
250 supernatant from 4HC-treated 4T1 and E0771 cells was applied to drug-naïve cells, indicating that the  
251 drug-treated cells secrete ISG-stimulatory cytokines (Fig. S2), such as the type-I IFNs, IFN $\alpha$  and IFN $\beta$ .  
252 Weak ISG responses were seen in B16F10 melanoma cells treated with 4HC or doxorubicin at their IC<sub>50</sub>  
253 concentrations (Fig. 1C; Fig. S1C). This finding is consistent with the weak immune responses seen in  
254 CPA-treated B16F10 tumors implanted in syngeneic mice (36).

255

256 ISGs are induced by multiple signaling pathways in 4HC-treated TNBC cells. To assess the role of type-I  
257 IFN signaling in these ISG responses, 4T1 and E0771 cells were treated with 4HC in combination with  
258 anti-IFNAR1 antibody under conditions that effectively blocks direct type-I IFN responses (Fig. S3). In  
259 both breast cancer cell lines, anti-IFNAR1 antibody completely blocked 4HC induction of *Igtp*, but only  
260 partially inhibited the induction of *Oas1* and *Cxcl10* (Fig. 2A, Fig. 2B). Thus, IFNAR1 signaling  
261 contributes to, but does not entirely explain, the latter two ISG responses to 4HC treatment. To further  
262 investigate the underlying mechanism for ISG induction, cells were transfected with the ds-RNA analog,  
263 poly I:C, both with and without anti-IFNAR1 antibody. All three ISGs were induced by poly I:C in both cell  
264 lines, but only the 4T1 cell response was completely blocked by anti-IFNAR1 antibody (Fig. 2C, Fig. 2D).  
265 Thus, E0771 cells showed a pattern of partial inhibition of ISG induction by anti-IFNAR1 antibody with



266 both 4HC and poly I:C. These findings are consistent with the proposal that 4HC activates a dsRNA-  
267 dependent mechanism leading to an increase in type-I IFN production and the observed downstream  
268 ISG responses. The partial inhibition by anti-IFNAR1 antibody of *Oas1* and *Cxcl10* induction indicates  
269 these ISGs can also be formed by a type-I IFN-independent mechanism in 4HC-treated cells.

270

271 Global effects of 4HC exposure. RNA-seq was used to characterize the global impact of 4HC exposure  
272 on both type-I IFN-dependent and type-I IFN-independent genes that may potentially contribute to  
273 downstream immunostimulatory responses in each breast cancer line. In 4T1 cells, 4HC induced  
274 expression of 1043 genes, of which 388 (37%) also responded to short-term stimulation with  
275 recombinant IFN $\beta$ , which identifies the latter genes as 4T1 breast cancer type-I ISGs (Fig. 3A). Similarly,  
276 in E0771 cells, 188 (34%) of 568 genes induced by 4HC were also induced by IFN $\beta$  (Table S1). Top  
277 functional annotation clustering terms include innate immunity and virus response (Fig. 3A, Table S2),  
278 consistent with 4HC inducing many type-I IFN response genes in both breast cancer lines. Further  
279 supporting the proposed activation of type-I IFN signaling by 4HC in both TNBC models, we identified  
280 110 genes induced by both 4HC and IFN $\beta$  in both cell lines, and for 97 of these genes, anti-IFNAR1  
281 antibody significantly inhibited gene induction by 4HC (Table S1C). Finally, in 4T1 cells but not E0771  
282 cells, many other genes were suppressed by 4HC, with enrichment for mRNA splicing and ribosome  
283 biogenesis. Notably, 85 of these genes were also suppressed by IFN $\beta$  treatment (Fig. 3B, Table S1,  
284 Table S2).

285

286 Metronomic CPA induces 4T1 tumor growth stasis – We investigated the impact of CPA treatment on  
287 growth of implanted 4T1 tumors, ISG expression, and immune cell recruitment. Female BALB/c mice  
288 with orthotopic 4T1 tumors were treated with CPA (130 mg/kg) or placebo (PBS) on an intermittent  
289 metronomic, 6-day repeating schedule (MEDIC schedule; (22)). CPA dramatically reduced the rapid  
290 growth seen in drug-free tumors (placebo group) within one treatment cycle, inducing growth stasis that  
291 persisted through 7 cycles (Fig. 4A). When treatment was halted after 4 CPA cycles, tumor growth  
292 resumed 12 days later (Fig. 4A, day 36). Analysis of total tumor RNA extracted after 2, 4 and 7 CPA  
293 cycles revealed that the ISGs *Cxcl10* and *Mx1* were initially upregulated but returned to baseline after  
294 discontinuation of CPA treatment (Fig. 4B). We evaluated tumor immune cell infiltration by monitoring  
295 changes in the expression of *Cd8a*, *Cd68*, and *Nkp46*, immune cell markers for cytotoxic T-cells,  
296 macrophages, and natural killer cells, respectively. *Cd8a* showed a 6-fold increase peaking after 2  
297 cycles then decreased with further CPA treatment, perhaps reflecting CPA-induced immune cell  
298 cytotoxicity. Similarly, *Cd68* increased 3-fold after 4 cycles then declined, while *Nkp46* showed no  
299 significant changes in expression at any time point (Fig. 4C). The immune cell effector markers *Ifng*, *Prf1*  
300 and *Gzmb* also showed peak induction after 2 CPA cycles then decreased with further treatment.

301 These findings were validated by RNA-seq analysis of total tumor RNA across the time course, which  
302 identified hundreds of treatment-induced gene responses. Innate immunity, immune response and  
303 cellular response to interferon-beta represent the top Functional Annotation Clusters of up regulated  
304 genes after 2, 4 and 7 CPA treatment cycles (Table S4). Notably, these immune response gene clusters  
305 were not found in the regrowing tumors when CPA treatment was halted after 4 cycles (Table S4). Thus,  
306 in 4T1 tumors, metronomic CPA activated a transient immune response associated with tumor growth  
307 stasis.

308

309 Metronomic CPA induces robust E0771 tumor regression and immune cell recruitment – Major  
310 regression of E0771 tumors was seen within 2 CPA treatment cycles (Fig. 5A), in contrast to the growth  
311 stasis response of 4T1 tumors. ISG induction was comparatively weak; it was first seen on day 2,  
312 peaked on day 3, then declined and was undetectable by day 12 (Fig. 5B). Importantly, ISG induction  
313 was followed by strong immune cell recruitment by days 6 and 12 (Fig. 5C). T-regs (*Foxp3*) initially  
314 decreased at day 2 before returning to basal levels by day 6 (Fig. 5C).

315 E0771 tumor RNA-seq analysis revealed an interesting pattern: there were relatively few gene  
316 expression changes during the first 3 days after CPA treatment, followed by large numbers of treatment-  
317 responsive genes on days 6 and 12 (i.e., after 1 and 2 treatment cycles) (Fig. 6A). Genes were grouped  
318 by whether their response to treatment was early (days 1-3) or late (days 6, 12), and whether the  
319 response was sustained through day 12 or was not (i.e., transient) (Fig. 6B, Table S5A, S5B). Top  
320 Functional Annotation Clusters included innate immunity for both Early-Transient and Late up regulated  
321 genes, whereas inflammatory response was a top cluster term for Early-Sustained induced genes (Table  
322 S5C-S5F). Comparison to the set of 188 type-I IFN response genes identified in cultured E0771 cells  
323 (Fig. 3A; common response to 4HC and IFNB) revealed a striking, 61-fold enrichment in the set of 73  
324 Early-Transient (induced) genes, 52 (71%) of which were in the 188 gene set ( $p < E-05$  vs background  
325 set of all expressed genes; Fisher's exact test). The type-I IFN response genes showed no enrichment  
326 in the Early-Sustained induced gene set (0 of 56 genes) and marginal enrichment in the Late induced  
327 gene set (35 out of 1,666 genes; 1.38-fold enrichment,  $p = 0.09$ ) (Fig. 6B). Thus, CPA induces an early  
328 type-I IFN response that is not sustained through day 12, by which time there is major immune cell  
329 infiltration (Fig. 5C) and a 14-fold increase in the overall number of differentially expressed genes (Fig.  
330 6A). Early-Sustained down regulated genes were enriched for sterol and lipid metabolism, while the  
331 large set of Late down genes was enriched for cell cycle and transcriptional regulation terms (Fig. S5G,  
332 S5H).

333 Finally, ALAS2, a heme biosynthetic enzyme, and six hemoglobin genes (most notably four HBB genes)  
334 were strongly down regulated by CPA on days 1-3, but then strongly up regulated after 2 treatment  
335 cycles (Fig. 6B, Table S5I). Hemoglobin-beta (HBB) contributes to breast cancer neoangiogenesis and

336 metastasis by a tumor cell protective anti-oxidant mechanism (37,38), but also becomes a dominant  
337 self-antigen target of CD8-T cells in tumor pericytes following IL12 immunotherapy (39).

338

339 E0771 tumor regression requires CD8+ T-cells – Next, we used an immune-depletion strategy to  
340 ascertain the role of CD8-T cells in metronomic CPA-induced E0771 tumor regression. To minimize the  
341 direct effects of CPA cytotoxicity and maximize possible immune system contributions, we decreased  
342 the CPA dose from 130 mg/kg to 110 mg/kg, which was effective at inducing tumor regression, ISG  
343 induction, and immune cell recruitment (Fig. S4). Anti-mouse CD8 $\alpha$  antibody, or control IgG, was  
344 administered to E0771 tumor-bearing mice beginning 5 days before the first CPA treatment on day 0.  
345 FACS analysis confirmed the depletion of circulating CD8 T-cells by day 1, which persisted for at least 5  
346 weeks after the last antibody injection on day 15 (Fig. S5, Fig. S6). Moreover, in contrast to the near-  
347 complete tumor regression achieved in the CPA + control IgG group, an extended period of tumor  
348 growth stasis followed by robust tumor regrowth was evident in mice receiving CPA + anti-CD8 $\alpha$   
349 antibody (Fig. 7A). We conclude that CD8 T-cells are essential for CPA-induced tumor regression, and  
350 in their absence, E0771 tumors escape the cytotoxic effects of CPA treatment.

351 CPA induction of the ISG *Mx1* was unaffected by anti-CD8 $\alpha$  antibody, as was expected given the  
352 expectation that ISG gene induction occurs upstream of immune cell infiltration. Other ISGs, whose  
353 induction by CPA in E0771 tumors was transient (seen on days 2, 3 and 6, but not day 12; Fig. 5B),  
354 were not induced in the day 12 tumor samples (Fig. 7B). Importantly, anti-CD8 $\alpha$  antibody abolished the  
355 increase in tumor-infiltrating CD8 T-cells (*Cd8a*), as well as the increase in *Ifng*, which is produced by  
356 tumor-infiltrating CD8 T-cells and could be an important contributor to tumor regression. Surprisingly, the  
357 induced expression of the NK cell marker *Nkp46* was further augmented by anti-CD8 $\alpha$ , while *Prf1*, which  
358 is produced by both CD8 T-cells and NK cells, showed no net change in expression (Fig. 7C).

359 Regrowth of the regressed CPA + control IgG treated tumors became apparent once CPA treatment  
360 was discontinued on day 60, after which the tumors became resistant to further CPA treatment (Fig. 7A).  
361 The expression of *Mx1* decreased below basal levels in the regrowing tumors (Fig. 7B), as did that of  
362 *Cd8a*, *Nkp46* and the cytotoxic effectors *Ifng* and *Prf1* (Fig. 7C), which may contribute to the emerging  
363 resistance to CPA. Together, these findings provide strong support for the conclusion that metronomic  
364 CPA-induced recruitment of CD8 T-cells is essential for E0771 tumor regression.

365 Role of type-I IFN signaling in CPA-induced immune cell recruitment and tumor regression – We used  
366 an inhibitory IFNAR-1 antibody to determine the functional role of type-I IFN signaling and the impact of  
367 the transient, downstream induction of ISGs on CPA-induced immune cell recruitment and tumor  
368 regression. Mice bearing E0771 tumors were given anti-mouse IFNAR-1, or control IgG, beginning 1 day  
369 prior to the first CPA treatment on day 0 (Fig. 8A). Remarkably, the major tumor regression seen by day

370 12 in the CPA + control IgG mouse group was fully blocked in all 16 mice given CPA + anti-IFNAR-1  
371 antibody. Furthermore, robust tumor growth persisted in 5 of the 8 mice that we continued to monitor  
372 after anti-IFNAR1 treatment was halted on day 12, and only moderate regression was observed in the 3  
373 other mice, despite ongoing CPA treatment. This result contrasts to the growth static response to CPA  
374 seen in CD8 T-cell-depleted tumors (Fig. 7) and indicates that direct CPA tumor cell cytotoxicity has  
375 limited impact on tumor growth in the absence of IFNAR1 signaling.

376 Gene expression analysis showed that anti-IFNAR1 antibody reduced ISG expression below control  
377 tumor levels by day 12, indicating the antibody is highly effective in blocking tumor IFN signaling (Fig.  
378 8B). ISG expression returned to basal levels by day 30, i.e., 18 days after antibody treatment was halted  
379 on day 12. Anti-IFNAR1 also reduced tumor infiltration of all tested immune cells by day 12 (Fig. 8C).  
380 The reduction of tumor infiltrating CD8 T-cells was further supported by FACS analysis of tumor tissue  
381 (Fig. S7A) and occurred without any changes in circulating CD8 T-cells (Fig. S7B). Thus, depletion of  
382 tumor infiltrating CD8 T-cells, and likely other infiltrating immune cells, is a consequence of the inhibition  
383 of tumor type-I IFN signaling and not a systemic effect. Day 12 CD8a T cell marker levels were restored  
384 by day 30 in the three anti-IFNAR1-treated tumors that were partially responsive to CPA, but not in the  
385 five CPA-unresponsive tumors (Fig. 8C, PR vs. U groups), which could help explain their differences in  
386 CPA responsiveness.

387

## 388 **Discussion**

389 Effective treatment of TNBC continues to be challenging, with limited therapeutic options and high rates  
390 of disease recurrence (40). Cytotoxic chemotherapies, including CPA, remain the primary systemic  
391 treatment modality for TNBC despite highly variable treatment responses and frequent development of  
392 chemo-resistance (41). Here, we explored the role of innate immunity in relation to cytotoxic treatment  
393 response and resistance in TNBC. We used two orthotopic mouse models of TNBC, 4T1 and E0771, to  
394 investigate the chemo-immunogenic activity of CPA when delivered on a metronomic, medium-dose  
395 intermittent schedule (22). 4HC, a chemically activated CPA derivative that spontaneously decomposes  
396 to yield the same active metabolite as CPA, induced the expression of hundreds of ISGs in both TNBC  
397 cell models in a manner similar to doxorubicin, an established immune-stimulatory chemotherapeutic  
398 agent (42). These tumor cell-centric ISG responses to activated CPA were at least in part dependent on  
399 signaling by the type-I IFN receptor, IFNAR-1, implicating tumor cell production of type-I IFNs in these  
400 drug-induced ISG responses. Many of the ISG responses seen in TNBC cell culture were recapitulated  
401 *in vivo* in MEDIC CPA-treated TNBC tumors implanted in syngeneic mice. Notably, CPA-treated 4T1  
402 tumors showed robust type-I IFN signaling and tumor immune cell infiltration, leading to an overall tumor  
403 growth static response. In contrast, E0771 tumors exhibited a somewhat weaker IFN response, but this  
404 was followed by robust immune infiltration and extensive tumor regression, both of which were

405 absolutely dependent on type-I IFN signaling by IFNAR-1. Thus, a robust IFN-mediated immune  
406 response may be essential for the efficacy of metronomic CPA in TNBC. Furthermore, our findings raise  
407 the possibility that treatment resistance to CPA, and perhaps other chemo-immunogenic cytotoxic  
408 agents, may stem from silencing of the IFN pathway.

409 ISG induction was an early response to drug treatment in both TNBC models, both in cell culture and  
410 following CPA treatment of implanted tumors *in vivo*. The ISG responses seen *in vivo* were transient  
411 (Fig. 6B) and were followed by strong increases in both innate and adaptive infiltrating immune cells,  
412 including NK cells and CD8a T-cells, after 6-12 days (i.e., 1-2 CPA treatment cycles). Type-I IFNs and  
413 the ISGs they induce are known to stimulate T-cells, NK cells, macrophages and dendritic cells, and  
414 other immune cells (18). ISG induction may thus be a useful marker for immunogenic potential *in vivo*.  
415 Of note, the ISG responses seen in our TNBC models were not apparent until 48 h after drug treatment,  
416 even though ISG gene induction *per se* is a rapid process, as was seen when TNBC cells were treated  
417 with IFN $\beta$  directly (Fig. S3). The delay in ISG induction seen in CPA-treated TNBC cells and tumors  
418 likely reflects time required for CPA to effect tumor cell damage and the associated production of  
419 immunostimulatory damage-associated molecular pattern molecules. These may include double  
420 stranded RNAs and nucleic acid agonists of STING, which can activate cytosolic sensors and induce  
421 type-I IFN production through established mechanisms (21).

422 Using RNA-seq, we validated the transient nature of CPA-induced ISG responses on a global scale. We  
423 identified a set of 188 ISGs that responded in common to IFN $\beta$  and to 4HC treatment in cultured E0771  
424 cells, as well as 380 commonly responding ISGs in 4T1 cells. Strikingly, 52 of the 188 E0771 ISGs  
425 showed an early, transient response in CPA-treated E0771 tumors, where they comprised 71% of the  
426 Early-Transient response gene set, representing a 61-fold enrichment compared to a background set of  
427 all expressed genes (Fig. 6). These 52 genes comprise a robust set of CPA-responsive E0771 ISGs and  
428 could serve as useful markers for early chemo-immunogenic responses to CPA treatment *in vivo*.

429 The ability of anti-IFNAR1 antibody to almost completely abolish CPA-induced E0771 tumor regression  
430 establishes that type-I IFN signaling is essential for the anti-tumor actions of metronomic CPA in this  
431 TNBC model. This, in turn, leads us to the unexpected conclusion that the intrinsic tumor cell cytotoxicity  
432 of CPA does not translate into a major therapeutic response in the absence of type-I IFN signaling.  
433 These findings support a model whereby CPA-induced tumor cell damage induces the major anti-tumor  
434 effects of CPA on E0771 tumors indirectly, via its ability to activate tumor cell autonomous type-I IFN  
435 signaling linked to an immunogenic cell death mechanism. Of note, we observed tumor growth stasis  
436 was when circulating and tumor cell infiltrating CD8 T-cells were immuno-depleted, i.e., the block in CPA  
437 anti-tumor activity was less complete than with anti-IFNAR1 antibody. This tumor growth stasis response  
438 is likely mediated by other tumor infiltrating immune cells, e.g., NK cells, whose CPA-induced levels



439 were further increased by CD8a T-cell depletion (Fig. 7C). The ability of NK cells to contribute to the  
440 anti-tumor effects of metronomic CPA is supported by earlier findings in glioma models (24,43).

441 The two TNBC models studied here, 4T1 and E0771, exhibited notable differences in their ISG, immune  
442 cell, and therapeutic responses to MEDIC CPA treatment *in vivo*. 4T1 tumors were characterized by a  
443 stronger and longer lasting ISG induction, but this did not translate into a greater anti-tumor response.  
444 This is evidenced by the growth stasis observed in 4T1 tumors versus the major regression seen in  
445 E0771 tumors. Combination chemo-immuno therapies designed to stimulate immunogenic cell death  
446 and activate a more robust anti-tumor response (44) may be required for more effective treatment of 4T1  
447 tumors. Differences in mouse strain, tumor cell proliferation and angiogenesis, and mutational burden,  
448 which is much higher in E0771 than 4T1 tumors (45), could contribute to the differential responsiveness  
449 of these two TNBC models to CPA treatment. In addition, immunosuppressive regulatory T-cells (Foxp3<sup>+</sup>  
450 CD4<sup>+</sup>) increase with time in both TNBC models, but only E0771 tumors display an early growth period  
451 when a majority of tumor-associated CD4<sup>+</sup> T-cells are immunostimulatory (29), resulting in a more  
452 favorable environment for CPA responses. Further study of the mechanisms underlying metronomic  
453 CPA-induced E0771 tumor regression and the comparative resistance of 4T1 tumors may help identify  
454 useful biomarkers for tumor responsiveness and could lead to the discovery of new molecular targets for  
455 increasing effectiveness of chemotherapy in poorly responsive TNBC. Recent clinical trials have used  
456 CPA in combination with other drugs to treat TNBC with varying degrees of success (46-49), and there  
457 may be opportunities for further improvements based on metronomic dose and schedule optimization  
458 (22).

459 Finally, the treatment models developed here may provide an important means to develop clinically  
460 translatable markers of chemo-immunogenic treatment response and resistance. The gene signatures  
461 identified by our RNA-seq analysis may be useful in pre-treatment biopsies to identify patients more  
462 likely to elicit an IFN-mediated treatment response. There is also substantial interest in identifying non-  
463 invasive imaging markers of chemotherapy treatment response (50). Therapy-induced responses,  
464 including apoptosis, proliferation, and overall treatment response, can be monitored in real time in  
465 preclinical oncology models by label-free optical imaging techniques, such as spatial frequency domain  
466 imaging (51,52). The preclinical therapy models described here provide a means to discover novel  
467 imaging markers that discriminate chemo-immunogenic sensitive and resistance tumors (53). As similar  
468 imaging markers can be tracked in patients with clinical imaging modalities such as PET and optical  
469 diffuse optical spectroscopy, it may be possible to rapidly identify both treatment response and  
470 resistance and adjust the treatment regimen accordingly (54,55).

471

472



473 **Author contributions**

474 Initial 4T1 cell culture work and 4T1 tumor model studies were performed by KAD and CV. All of the  
475 other experimental work, including studies of cultured E0771 cells and tumors and RNA-seq analysis  
476 was carried out by CV. Data analysis and preparation of figures were carried out by CV and DJW. The  
477 manuscript was initially drafted by CV with input from DJW and DR, then edited and finalized by DJW.  
478 All authors contributed to experimental design and reviewed and approved the final manuscript. The  
479 project was conceived and supervised by DJW.

480

481 **References**

- 482 1. Marra A, Viale G, Curigliano G. Recent advances in triple negative breast cancer: the  
483 immunotherapy era. *BMC Med* **2019**;17:90
- 484 2. Hudis CA, Gianni L. Triple-negative breast cancer: an unmet medical need. *Oncologist* **2011**;16  
485 Suppl 1:1-11
- 486 3. Steiner M, Tan AR. The evolving role of immune checkpoint inhibitors in the treatment of triple-  
487 negative breast cancer. *Clin Adv Hematol Oncol* **2021**;19:305-15
- 488 4. Keenan TE, Tolaney SM. Role of Immunotherapy in Triple-Negative Breast Cancer. *J Natl*  
489 *Compr Canc Netw* **2020**;18:479-89
- 490 5. Sukumar J, Gast K, Quiroga D, Lustberg M, Williams N. Triple-negative breast cancer: promising  
491 prognostic biomarkers currently in development. *Expert Rev Anticancer Ther* **2021**;21:135-48
- 492 6. Ahmed A, Tait SWG. Targeting immunogenic cell death in cancer. *Mol Oncol* **2020**;14:2994-3006
- 493 7. Garg AD, More S, Rufo N, Mece O, Sassano ML, Agostinis P, *et al.* Trial watch: Immunogenic  
494 cell death induction by anticancer chemotherapeutics. *Oncoimmunology* **2017**;6:e1386829
- 495 8. Kepp O, Senovilla L, Vitale I, Vacchelli E, Adjemian S, Agostinis P, *et al.* Consensus guidelines  
496 for the detection of immunogenic cell death. *Oncoimmunology* **2014**;3:e955691
- 497 9. Galluzzi L, Vitale I, Warren S, Adjemian S, Agostinis P, Martinez AB, *et al.* Consensus guidelines  
498 for the definition, detection and interpretation of immunogenic cell death. *J Immunother Cancer*  
499 **2020**;8
- 500 10. Chao MP, Jaiswal S, Weissman-Tsukamoto R, Alizadeh AA, Gentles AJ, Volkmer J, *et al.*  
501 Calreticulin is the dominant pro-phagocytic signal on multiple human cancers and is  
502 counterbalanced by CD47. *Sci Transl Med* **2010**;2:63ra94
- 503 11. Zitvogel L, Apetoh L, Ghiringhelli F, Kroemer G. Immunological aspects of cancer chemotherapy.  
504 *Nat Rev Immunol* **2008**;8:59-73
- 505 12. Elliott MR, Chekeni FB, Trampont PC, Lazarowski ER, Kadl A, Walk SF, *et al.* Nucleotides  
506 released by apoptotic cells act as a find-me signal to promote phagocytic clearance. *Nature*  
507 **2009**;461:282-6

- 508 13. Sistigu A, Yamazaki T, Vacchelli E, Chaba K, Enot DP, Adam J, *et al.* Cancer cell-autonomous  
509 contribution of type I interferon signaling to the efficacy of chemotherapy. *Nat Med*  
510 **2014**;20:1301-9
- 511 14. Casares N, Pequignot MO, Tesniere A, Ghiringhelli F, Roux S, Chaput N, *et al.* Caspase-  
512 dependent immunogenicity of doxorubicin-induced tumor cell death. *J Exp Med* **2005**;202:1691-  
513 701
- 514 15. Sun F, Shi J, Geng C. Dexrazoxane improves cardiac autonomic function in epirubicin-treated  
515 breast cancer patients with type 2 diabetes. *Medicine (Baltimore)* **2016**;95:e5228
- 516 16. Schiavoni G, Sistigu A, Valentini M, Mattei F, Sestili P, Spadaro F, *et al.* Cyclophosphamide  
517 synergizes with type I interferons through systemic dendritic cell reactivation and induction of  
518 immunogenic tumor apoptosis. *Cancer Res* **2011**;71:768-78
- 519 17. Du B, Waxman DJ. Medium dose intermittent cyclophosphamide induces immunogenic cell  
520 death and cancer cell autonomous type I interferon production in glioma models. *Cancer Lett*  
521 **2020**;470:170-80
- 522 18. Cheon H, Borden EC, Stark GR. Interferons and their stimulated genes in the tumor  
523 microenvironment. *Semin Oncol* **2014**;41:156-73
- 524 19. Borden EC. Interferons  $\alpha$  and  $\beta$  in cancer: therapeutic opportunities from new insights. *Nat Rev*  
525 *Drug Discov* **2019**;18:219-34
- 526 20. Sprooten J, Agostinis P, Garg AD. Type I interferons and dendritic cells in cancer  
527 immunotherapy. *Int Rev Cell Mol Biol* **2019**;348:217-62
- 528 21. Zitvogel L, Galluzzi L, Kepp O, Smyth MJ, Kroemer G. Type I interferons in anticancer immunity.  
529 *Nat Rev Immunol* **2015**;15:405-14
- 530 22. Wu J, Waxman DJ. Immunogenic chemotherapy: Dose and schedule dependence and  
531 combination with immunotherapy. *Cancer Lett* **2018**;419:210-21
- 532 23. Lai V, Neshat SY, Rakoski A, Pitingolo J, Doloff JC. Drug delivery strategies in maximizing anti-  
533 angiogenesis and anti-tumor immunity. *Adv Drug Deliv Rev* **2021**:113920
- 534 24. Wu J, Waxman DJ. Metronomic cyclophosphamide eradicates large implanted GL261 gliomas  
535 by activating antitumor Cd8(+) T-cell responses and immune memory. *Oncoimmunology*  
536 **2015**;4:e1005521
- 537 25. Chen CS, Doloff JC, Waxman DJ. Intermittent metronomic drug schedule is essential for  
538 activating antitumor innate immunity and tumor xenograft regression. *Neoplasia* **2014**;16:84-96
- 539 26. Khan KA, Ponce de León JL, Benguigui M, Xu P, Chow A, Cruz-Muñoz W, *et al.*  
540 Immunostimulatory and anti-tumor metronomic cyclophosphamide regimens assessed in primary  
541 orthotopic and metastatic murine breast cancer. *NPJ Breast Cancer* **2020**;6:29
- 542 27. Tao K, Fang M, Alroy J, Sahagian GG. Imagable 4T1 model for the study of late stage breast  
543 cancer. *BMC Cancer* **2008**;8:228
- 544 28. Ewens A, Mihich E, Ehrke MJ. Distant metastasis from subcutaneously grown E0771 medullary  
545 breast adenocarcinoma. *Anticancer Res* **2005**;25:3905-15

- 546 29. Huang Y, Ma C, Zhang Q, Ye J, Wang F, Zhang Y, *et al.* CD4+ and CD8+ T cells have opposing  
547 roles in breast cancer progression and outcome. *Oncotarget* **2015**;6:17462-78
- 548 30. Ewens A, Luo L, Berleth E, Alderfer J, Wollman R, Hafeez BB, *et al.* Doxorubicin plus interleukin-  
549 2 chemoimmunotherapy against breast cancer in mice. *Cancer Res* **2006**;66:5419-26
- 550 31. Percie du Sert N, Ahluwalia A, Alam S, Avey MT, Baker M, Browne WJ, *et al.* Reporting animal  
551 research: Explanation and elaboration for the ARRIVE guidelines 2.0. *PLoS Biol*  
552 **2020**;18:e3000411
- 553 32. Connerney J, Lau-Corona D, Rampersaud A, Waxman DJ. Activation of Male Liver Chromatin  
554 Accessibility and STAT5-Dependent Gene Transcription by Plasma Growth Hormone Pulses.  
555 *Endocrinology* **2017**;158:1386-405
- 556 33. Robinson MD, McCarthy DJ, Smyth GK. edgeR: a Bioconductor package for differential  
557 expression analysis of digital gene expression data. *Bioinformatics* **2010**;26:139-40
- 558 34. Lelieveld P, van Putten LM. Biologic activity of two derivatives and six possible metabolites of  
559 cyclophosphamide (NSC-26271). *Cancer Treat Rep* **1976**;60:373-9
- 560 35. Ma J, Chen CS, Blute T, Waxman DJ. Antiangiogenesis enhances intratumoral drug retention.  
561 *Cancer Res* **2011**;71:2675-85
- 562 36. Wu J, Jordan M, Waxman DJ. Metronomic cyclophosphamide activation of anti-tumor immunity:  
563 tumor model, mouse host, and drug schedule dependence of gene responses and their  
564 upstream regulators. *BMC Cancer* **2016**;16:623
- 565 37. Ponzetti M, Capulli M, Angelucci A, Ventura L, Monache SD, Mercurio C, *et al.* Non-conventional  
566 role of haemoglobin beta in breast malignancy. *Br J Cancer* **2017**;117:994-1006
- 567 38. Zheng Y, Miyamoto DT, Wittner BS, Sullivan JP, Aceto N, Jordan NV, *et al.* Expression of  $\beta$ -  
568 globin by cancer cells promotes cell survival during blood-borne dissemination. *Nat Commun*  
569 **2017**;8:14344
- 570 39. Komita H, Zhao X, Taylor JL, Sparvero LJ, Amoscato AA, Alber S, *et al.* CD8+ T-cell responses  
571 against hemoglobin-beta prevent solid tumor growth. *Cancer Res* **2008**;68:8076-84
- 572 40. Jia H, Truica CI, Wang B, Wang Y, Ren X, Harvey HA, *et al.* Immunotherapy for triple-negative  
573 breast cancer: Existing challenges and exciting prospects. *Drug Resist Updat* **2017**;32:1-15
- 574 41. Bianchini G, Balko JM, Mayer IA, Sanders ME, Gianni L. Triple-negative breast cancer:  
575 challenges and opportunities of a heterogeneous disease. *Nat Rev Clin Oncol* **2016**;13:674-90
- 576 42. Vacchelli E, Aranda F, Eggermont A, Galon J, Sautès-Fridman C, Cremer I, *et al.* Trial Watch:  
577 Chemotherapy with immunogenic cell death inducers. *Oncoimmunology* **2014**;3:e27878
- 578 43. Doloff JC, Waxman DJ. VEGF receptor inhibitors block the ability of metronomically dosed  
579 cyclophosphamide to activate innate immunity-induced tumor regression. *Cancer Res*  
580 **2012**;72:1103-15
- 581 44. Bezu L, Gomes-de-Silva LC, Dewitte H, Breckpot K, Fucikova J, Spisek R, *et al.* Combinatorial  
582 strategies for the induction of immunogenic cell death. *Front Immunol* **2015**;6:187

- 583 45. Yang Y, Yang HH, Hu Y, Watson PH, Liu H, Geiger TR, *et al.* Immunocompetent mouse allograft  
584 models for development of therapies to target breast cancer metastasis. *Oncotarget*  
585 **2017**;8:30621-43
- 586 46. Ferreira AR, Metzger-Filho O, Sarmento RMB, Bines J. Neoadjuvant Treatment of Stage IIB/III  
587 Triple Negative Breast Cancer with Cyclophosphamide, Doxorubicin, and Cisplatin (CAP  
588 Regimen): A Single Arm, Single Center Phase II Study (GBECAM 2008/02). *Front Oncol*  
589 **2017**;7:329
- 590 47. Lim ST, Park CH, Kim SY, Nam SJ, Kang EY, Moon BI, *et al.* The effect of adjuvant  
591 chemotherapy on survival in Korean patients with node negative T1c, triple negative breast  
592 cancer. *PLoS One* **2018**;13:e0197523
- 593 48. Montagna E, Bagnardi V, Canello G, Sangalli C, Pagan E, Iorfida M, *et al.* Metronomic  
594 Chemotherapy for First-Line Treatment of Metastatic Triple-Negative Breast Cancer: A Phase II  
595 Trial. *Breast Care (Basel)* **2018**;13:177-81
- 596 49. Sharma P, Barlow WE, Godwin AK, Pathak H, Isakova K, Williams D, *et al.* Impact of  
597 homologous recombination deficiency biomarkers on outcomes in patients with triple-negative  
598 breast cancer treated with adjuvant doxorubicin and cyclophosphamide (SWOG S9313). *Ann*  
599 *Oncol* **2018**;29:654-60
- 600 50. Fowler AM, Mankoff DA, Joe BN. Imaging Neoadjuvant Therapy Response in Breast Cancer.  
601 *Radiology* **2017**;285:358-75
- 602 51. Tabassum S, Tank A, Wang F, Karrobi K, Vergato C, Bigio IJ, *et al.* Optical scattering as an early  
603 marker of apoptosis during chemotherapy and antiangiogenic therapy in murine models of  
604 prostate and breast cancer. *Neoplasia* **2021**;23:294-303
- 605 52. Tabassum S, Zhao Y, Istfan R, Wu J, Waxman DJ, Roblyer D. Feasibility of spatial frequency  
606 domain imaging (SFDI) for optically characterizing a preclinical oncology model. *Biomed Opt*  
607 *Express* **2016**;7:4154-70
- 608 53. Tank A, Vergato C, Waxman DJ, Roblyer DM. Optical scattering serves as a prognostic  
609 biomarker for immune-mediated chemotherapy treatment response and resistance in a murine  
610 breast cancer model. *SPIE Photonics West2022*. p 11944.
- 611 54. Avril S, Muzic RF, Jr., Plecha D, Traughber BJ, Vinayak S, Avril N. <sup>18</sup>F-FDG PET/CT for  
612 Monitoring of Treatment Response in Breast Cancer. *J Nucl Med* **2016**;57 Suppl 1:34s-9s
- 613 55. Tank A, Peterson HM, Pera V, Tabassum S, Leproux A, O'Sullivan T, *et al.* Diffuse optical  
614 spectroscopic imaging reveals distinct early breast tumor hemodynamic responses to  
615 metronomic and maximum tolerated dose regimens. *Breast Cancer Res* **2020**;22:29
- 616
- 617

618 **Fig. 1. 4HC and doxorubicin induction of ISGs in cultured tumor cell lines.** **A.** 4T1 cells were  
 619 treated for 4 h with IC<sub>50</sub>-range concentrations of 4HC (5 μM) or doxorubicin (2 μM) (see Fig. S1),  
 620 followed by removal of drug and further incubation until 24, 48 or 72 h after initiating drug treatment.  
 621 RNA was then extracted and analyzed by qPCR for expression of the three indicated ISGs. **B.** E0771  
 622 cells were treated with 4HC (4.2 μM) or doxorubicin (1.7 μM) as described in A. **C.** B16F10 cells treated  
 623 with 4HC (20 μM) or doxorubicin (6.6 μM). Data shown are mean +/- SD for n = 2-3 replicates, with  
 624 statistical significance determined by 2-way ANOVA implemented in GraphPad Prism: \*, p < 0.05; \*\*, p <  
 625 0.01; \*\*\*, p < 0.001; \*\*\*\*, p < 0.0001.

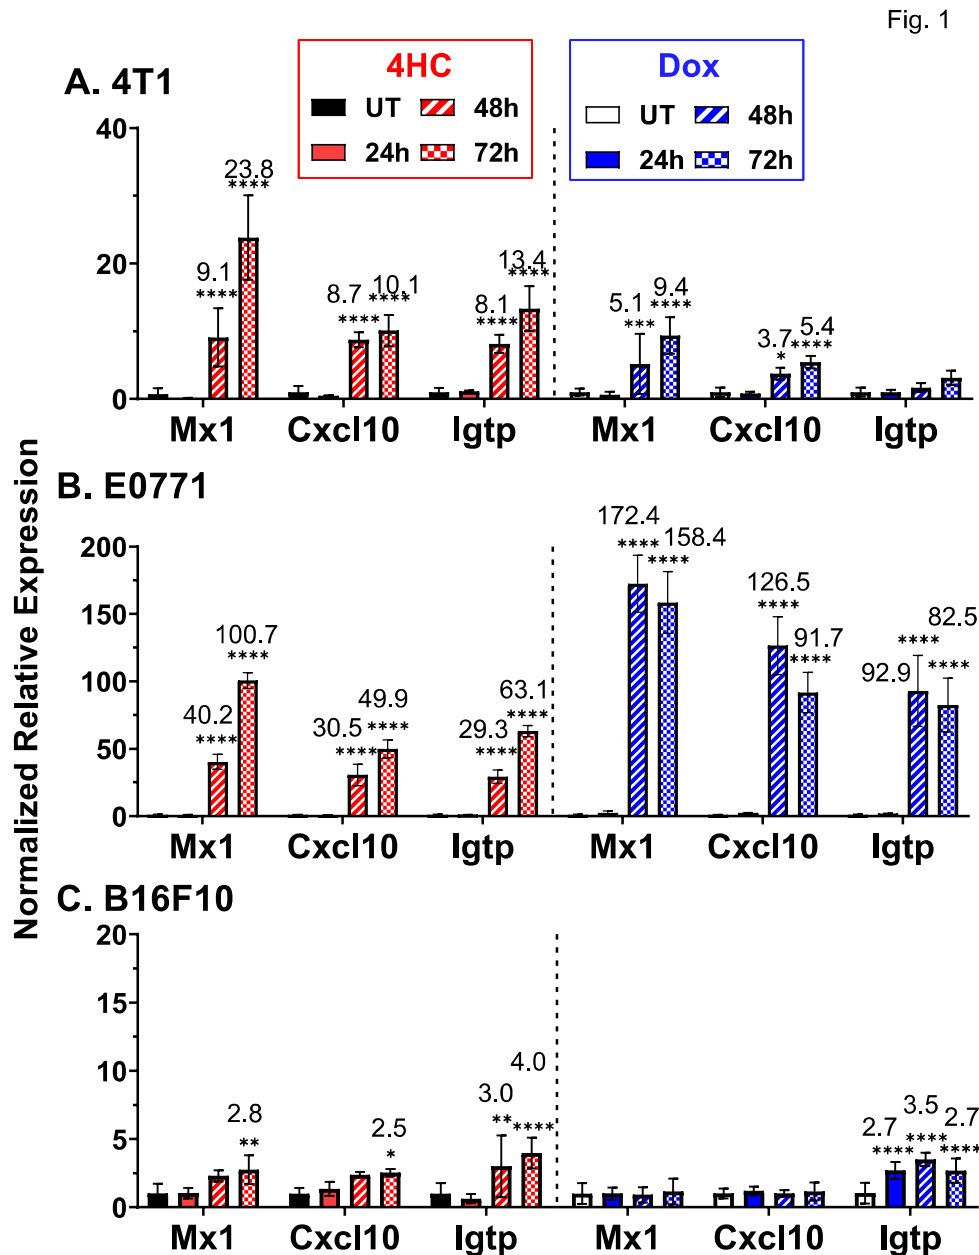

626

627 **Fig. 2. Anti-IFNAR-1 antibody Inhibits ISG induction by 4HC or poly (I:C)**

628 **A, B.** 4T1 and E0771 cells were treated with anti-IFNAR-1 antibody (10 µg/mL; Fig. S3) in combination  
629 with 4HC using the 72 h time-point protocol of Fig. 1, followed by qPCR analysis for ISG induction. **C, D.**  
630 4T1 and E0771 cells were treated with 1 µg/mL poly (I:C) for 4 h, alone or in combination with anti-  
631 IFNAR-1 antibody (10 µg/mL), then further incubated for 20 h in the presence of IFNAR-1 antibody  
632 followed by qPCR analysis of ISG induction. Data presented are mean +/- SD values for n=2-3  
633 replicates, with significance of the effect of antibody assessed by t-test: \*, p < 0.05; \*\*, p < 0.01; \*\*\*, p <  
634 0.001; \*\*\*\*, p < 0.0001. Percent gene expression was calculated as:  $((x \pm SD) - (z \pm SD)) / ((y \pm SD) - (z \pm SD))$ ,  
635 where x = 4HC or poly (I:C) with anti-IFNAR-1 expression value, z = untreated control  
636 expression value, and y = 4HC or poly (I:C) alone expression value. Fold-change values are listed  
637 above each bar. Results shown are representative of at least 2 or 3 independent experiments.

Fig. 2

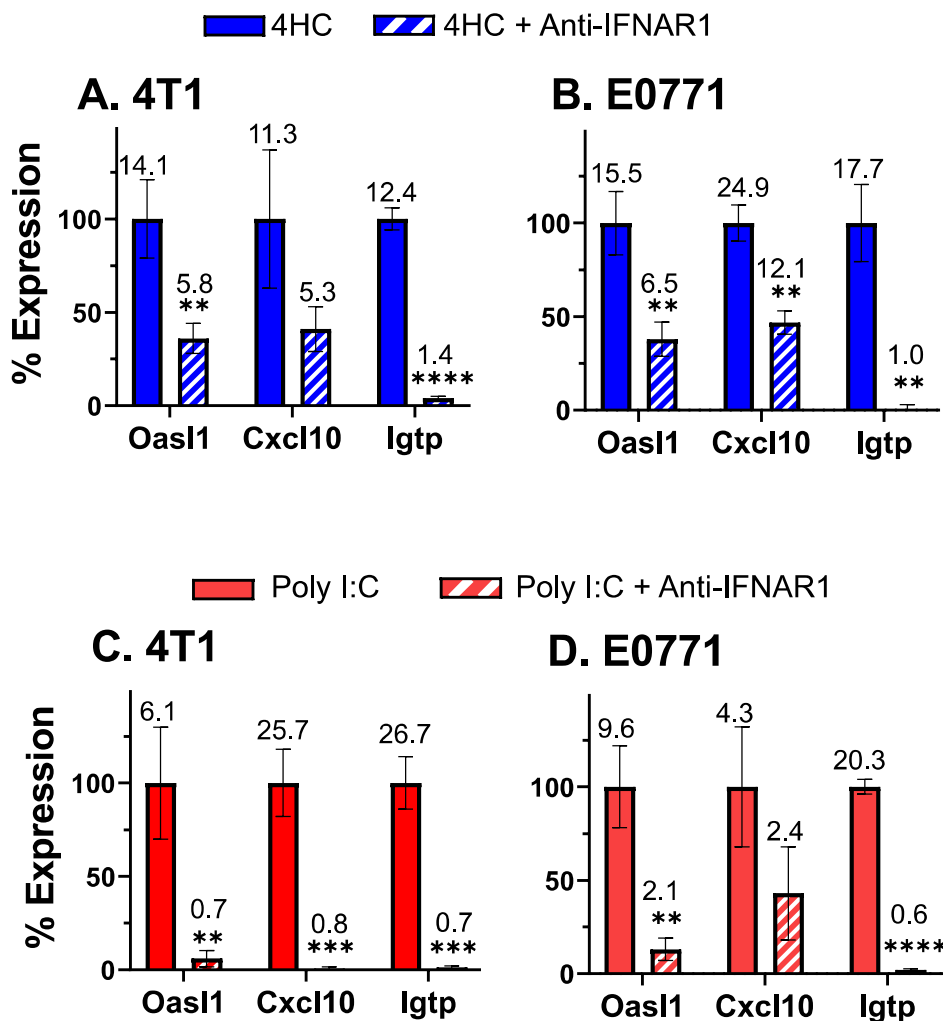

638

639



640 **Fig. 3. Gene responses to 4HC and IFN $\beta$  in cultured 4T1 and E0771 cells: RNA-seq analysis.** Venn  
641 diagrams showing numbers of genes induced (A) or repressed (B) in cells treated with 4HC (4 h  
642 exposure, harvest 68 h later, as in Fig. 1) or recombinant IFN $\beta$  (4 h exposure, 2 h harvest 2 h later)  
643 based on a >2-fold change in expression at FDR < 0.05. Full gene lists are shown in Table S1. Top  
644 functional annotation clustering terms for the indicated gene sets, and their enrichment significance, are  
645 shown in boxes. The full DAVID analysis is presented in Table S2.

646

## 647 A. Up regulated

648

649

650

651

652

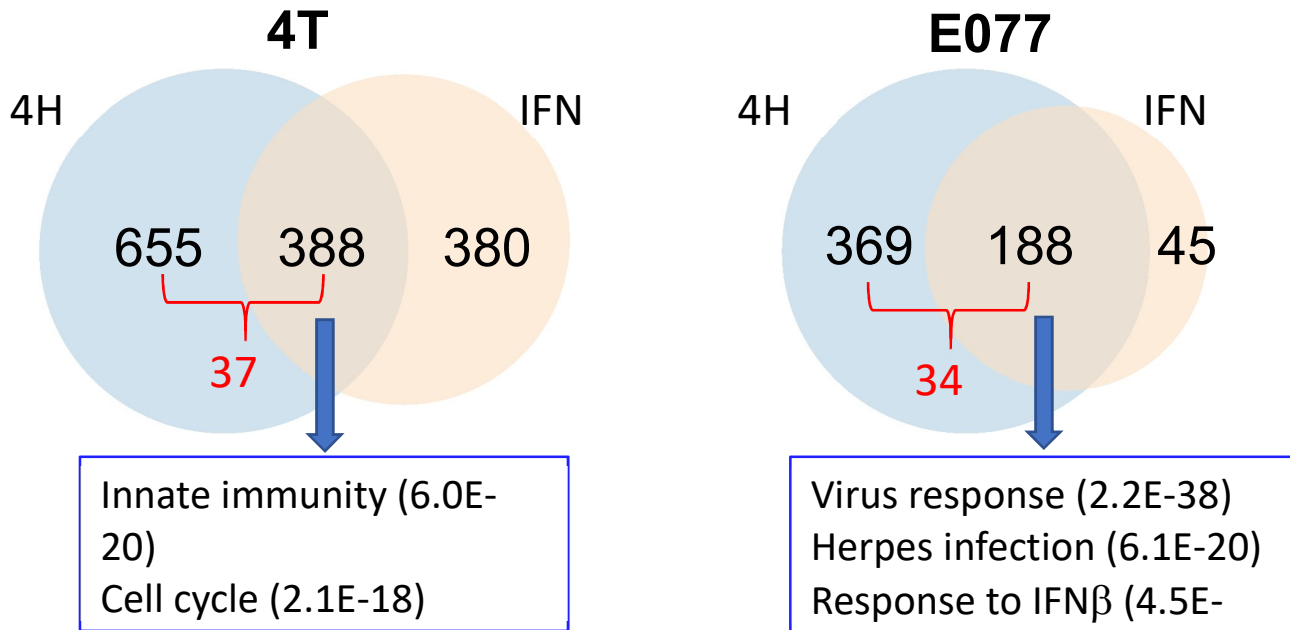

## B. Down regulated

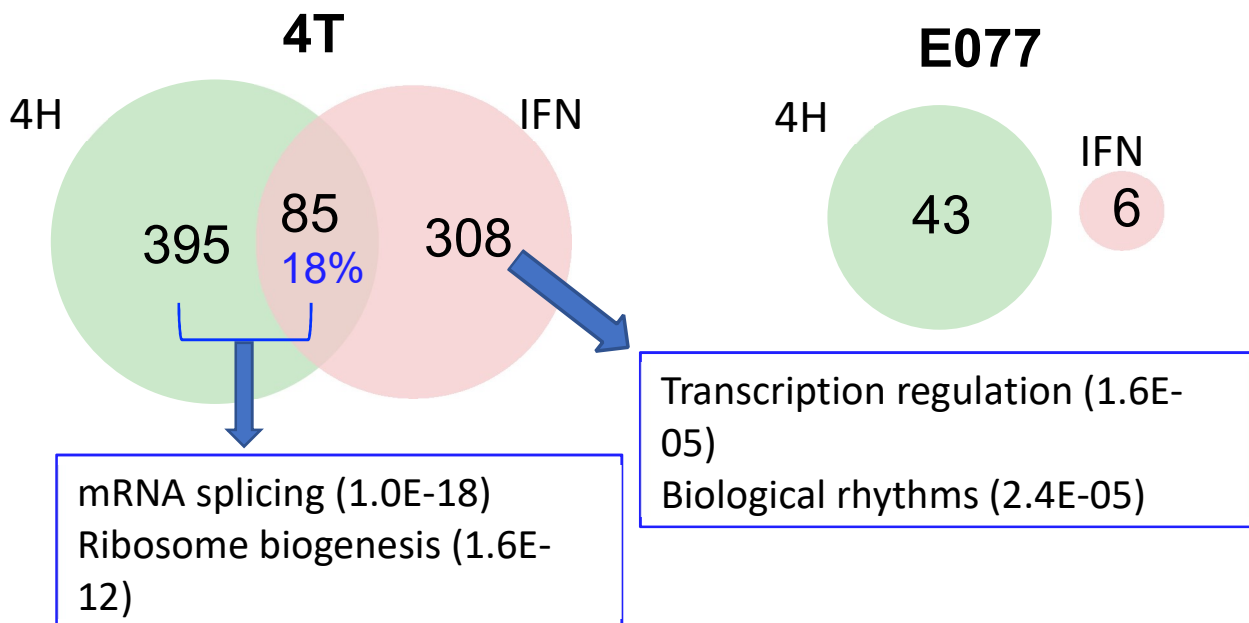

653 **Fig. 4. 4T1 tumor growth and gene expression changes induced by CPA treatment.**

654 **A.** 4T1 cells were implanted orthotopically in 6-week-old female BALB/c mice, then treated with 130  
 655 mg/kg CPA or PBS (placebo) on a 6-day metronomic schedule once mean tumor volumes reached 100-  
 656 150 mm<sup>3</sup>. Shown are group tumor volumes (mean +/- SEM) normalized to the volume on the first day of  
 657 CPA treatment (day 0). Mice were euthanized and tumors excised for qPCR analysis of tumor RNA (**B**,  
 658 **C**) on treatment days 12, 24 and 42, with n tumors/group, as indicated (box). Thus, the curve marked  
 659 CPA represents 17 tumors through day 12, then 10 tumors through day 24, and then 4 tumors through  
 660 day 42 (7 CPA treatment cycles). Data indicate exponential growth of placebo group vs growth stasis  
 661 through 7 CPA treatment cycles. Tumors began to regrow by day 36 when CPA was halted after 4  
 662 treatment cycles. **B, C.** qPCR analysis of ISGs and immune cell marker genes in tumor cell RNA. CPA  
 663 induced tumor ISG expression after 2, 4 and 7 treatment cycles, but the induction was reversed when  
 664 treatment was halted after 4 cycles. CPA induction of cytotoxic effector expression and immune cell  
 665 infiltration were reduced or lost with prolonged treatment. Significance (1-way ANOVA): \*, p < 0.05; \*\*, p  
 666 < 0.01; \*\*\*, p < 0.001; \*\*\*\*, p < 0.0001.

Fig. 4

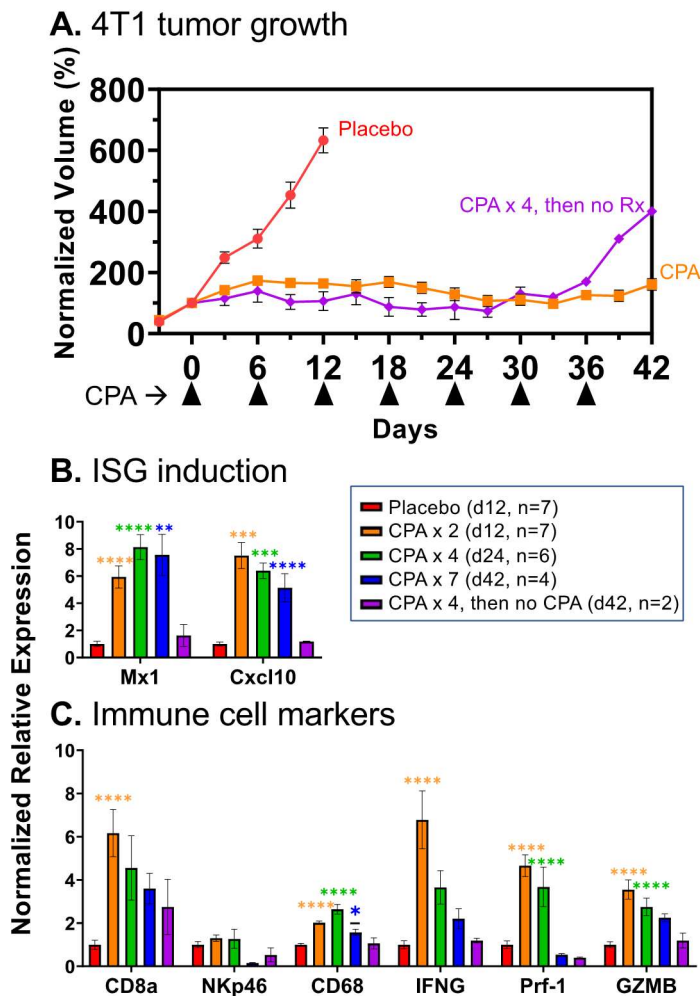

667

668 **Fig. 5. Tumor growth and gene expression changes in CPA-treated E0771 tumors.**

669 **A.** Impact of metronomic CPA treatment (110 mg/kg per injection; arrow heads along x-axis) on E0771  
 670 tumor growth. Data shown are mean  $\pm$  SEM tumor volumes for n=6 tumors per group, normalized to  
 671 100 percent of the Day 0 volume. **B, C.** qPCR analysis as in Fig. 4. The weak induction of ISGs was  
 672 highest three days after the first CPA dose, at which time immune cell infiltration and cytotoxic effectors  
 673 were first increased and then maintained through day 12. Increases in macrophages and dendritic cells  
 674 (*Cd11b*) were significant by t-test but not by ANOVA. Significance vs placebo group (2-way ANOVA): \*,  
 675  $p < 0.05$ ; \*\*,  $p < 0.01$ ; \*\*\*,  $p < 0.001$ ; \*\*\*\*,  $p < 0.0001$ .

Fig. 5

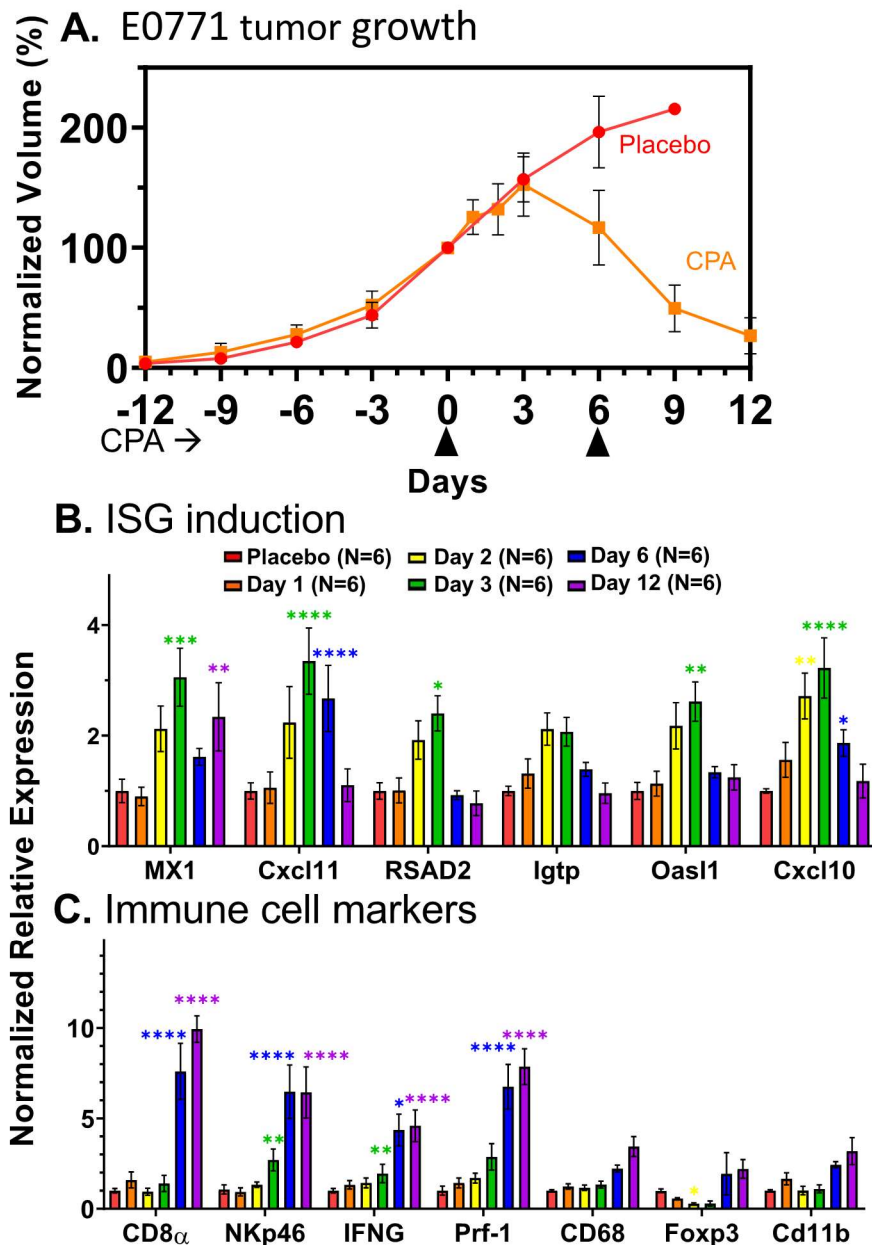

676

677 **Fig. 6. E0771 tumor RNA-seq. A.** Number of genes showing significant up regulation or down  
 678 regulation at each of 5 time points of metronomic CPA treatment. A total of 2,633 genes met the  
 679 thresholds for a significant response (Fold-change > 2 at edgeR-adjusted p-value < 0.05) at one or more  
 680 time points (Table S5A). **B.** The set of 2,633 responsive genes was classified based on the time course  
 681 of response, as detailed in Table S5B. Each set was analyzed for overlap with the set of 188 genes that  
 682 were up regulated by both 4HC and IFN $\beta$  in cultured E0771 cells (Fig. 3B), and enrichment scores with  
 683 significance by Fisher exact text calculated compared to a background set of all genes expressed at  
 684 FPKM > 1 as shown in Table S5B.

**Fig. 6**

**A.**

| Days after 1st CPA | Up genes | Down genes |
|--------------------|----------|------------|
| 1                  | 0        | 11         |
| 2                  | 47       | 18         |
| 3                  | 123      | 52         |
| 6 (1-cycle)        | 873      | 49         |
| 12 (2-cycles)      | 1742     | 708        |

**B.**

| E0771 Gene Response           | Genes (#) | IFN $\beta$ /4HC-induced genes (# out of 188) | Enrichment Score | p-value |
|-------------------------------|-----------|-----------------------------------------------|------------------|---------|
| Early-Transient (induced)     | 73        | 52                                            | 60.87            | < E-05  |
| Early-Sustained (induced)     | 56        | 0                                             | -                | NS      |
| Transient (induced)           | 71        | 2                                             | -                | NS      |
| Late (induced)                | 1666      | 35                                            | 1.38             | 0.09    |
| Early-Transient (repressed)   | 14        | 0                                             | -                | NS      |
| Early-Sustained (repressed)   | 26        | 0                                             | -                | NS      |
| Transient (repressed)         | 23        | 0                                             | -                | NS      |
| Late (repressed)              | 681       | 5                                             | 0.44             | NS      |
| Early-Repressed, Late-Induced | 7         | 0                                             | -                | NS      |
| Mixed                         | 16        | 0                                             | -                | NS      |

685

686

687

688 **Fig. 7. Impact of CD8a immunodepletion on CPA-induced E0771 tumor regression and immune**  
 689 **cell recruitment.**

690 **A.** E0771 tumors were treated with CPA every 6 days at 110 mg/kg (black arrow heads along x-axis),  
 691 alone or in combination with anti-CD8a or control IgG (blue arrow heads). Tumor volumes were  
 692 normalized to the percent of Day 0 volume (=100). By day 12, the placebo + control IgG, CPA + control  
 693 IgG, and CPA + Anti-CD8a groups showed 3 distinct growth patterns: exponential growth, tumor stasis  
 694 and tumor regression, respectively. Tumors resumed growth by day 42. CPA-regressed tumors  
 695 eventually regrew and became resistant to CPA treatment. Data shown are mean  $\pm$  SEM volumes for  
 696  $n=4$  tumors for the placebo + IgG group,  $n=5$  for CPA + IgG (d12),  $n=3$  for CPA + IgG (d84),  $n=7$  for  
 697 CPA + anti-CD8a (d12) and  $n=5$  for CPA + Anti-CD8a (d54). **B.** ISG induction was weak in all groups,  
 698 but the regrowing CPA-resistant tumors showed decreased ISG expression. **C.** Anti-CD8a antibody  
 699 prevented CPA-induced CD8 T-cell infiltration and IFNG production, but NK cell infiltration increased.  
 700 Significance (2-way ANOVA): \*,  $p < 0.05$ ; \*\*,  $p < 0.01$ ; \*\*\*,  $p < 0.001$ ; \*\*\*\*,  $p < 0.0001$ .

Fig. 7

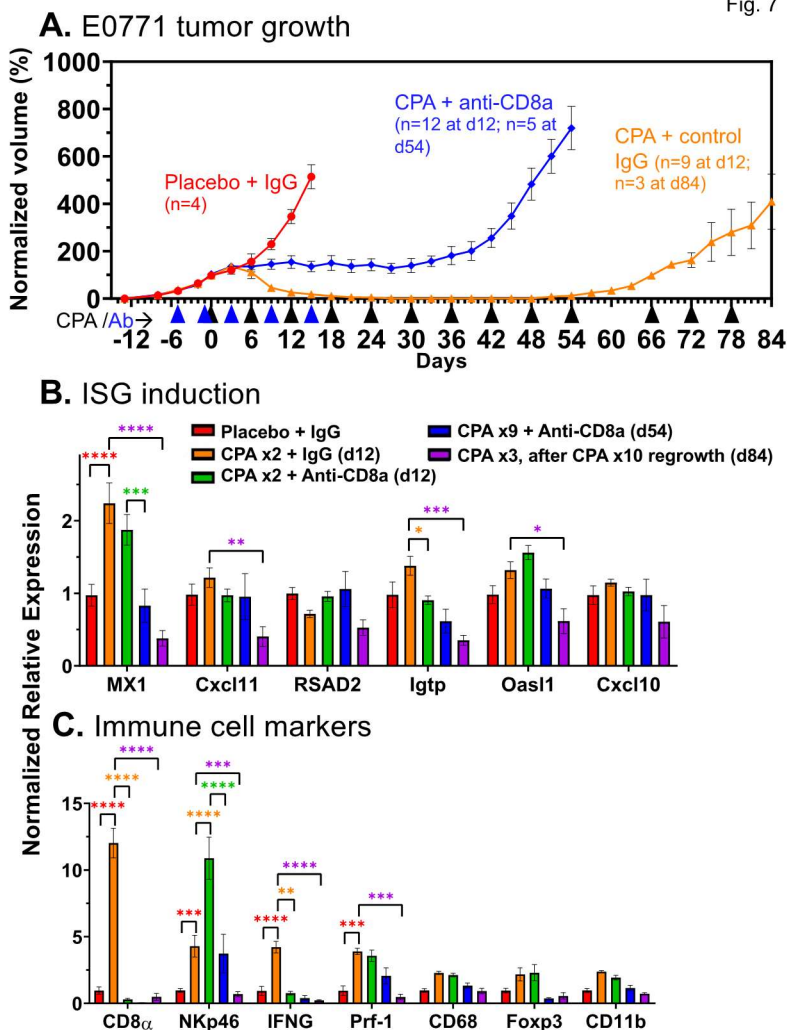

701

702 **Fig. 8. Type-I interferon signaling is required for E0771 tumor regression.**

703 **A.** E0771 tumors were treated with metronomic CPA, as in Fig. 6, alone or in combination with anti-  
 704 IFNAR1 to block type-I interferon signaling. Data shown are mean  $\pm$  SEM volumes for n=4 tumors for  
 705 the placebo + IgG group, n=5 for CPA + control IgG, and n=16 (through day 12) for CPA + anti-IFNAR1  
 706 (decreasing to n=5 from day 12-30, due to 8 tumors excised for analysis on day 12). Tumors in the CPA  
 707 + anti-CD8a group showed two distinct growth patterns: Unresponsive, with strong continued growth  
 708 through day 30; and Partially responsive, as indicated by growth stasis or moderate regression, as  
 709 marked. Tumor volumes were normalized to the percent of Day 0 volume (=100). Significance (2-way  
 710 ANOVA): \*,  $p < 0.05$ ; \*\*,  $p < 0.01$ ; \*\*\*,  $p < 0.001$ ; \*\*\*\*,  $p < 0.0001$ . **B, C.** Tumor ISGs were significantly  
 711 depleted by anti-CD8a antibody, which also suppressed CPA-induced CD8 T-cell infiltration and IFNG  
 712 and Prf-1 production. Of note, in this cohort of mice, the CPA + control IgG tumors were eradicated and  
 713 by day 84 did not show the tumor regrowth seen in the mice shown in Fig. 7A.

Fig. 8

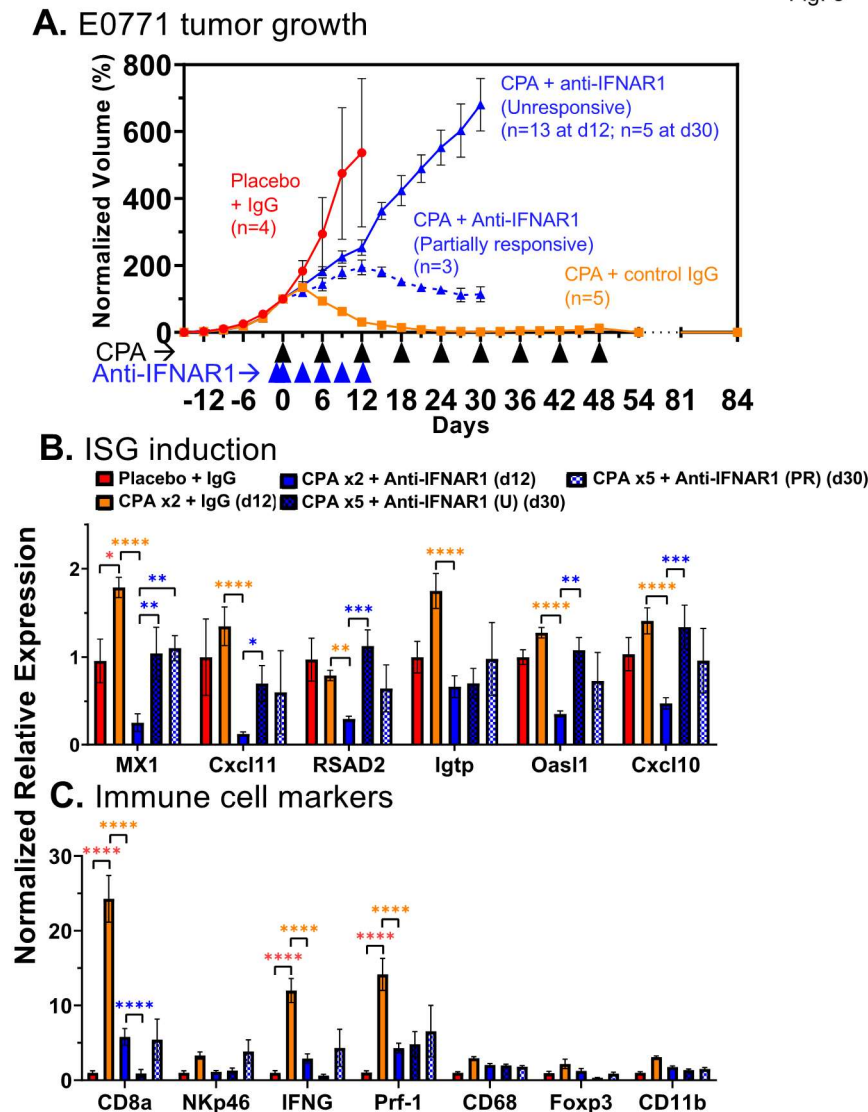

714



## Supplemental figures

**Fig. S1. Dose-dependence of drug sensitivity of cultured 4T1, E0771 and B16F10 cells.** Shown are viability assays determined in MTS assays over multi-log<sub>10</sub> range of 4HC (left) and doxorubicin (right) for 4T1 (A), E0771 (B) and B16F10 cells (C). Data points: mean +/- SD values for n = 3 wells of a 96-well plate. IC50 values were determined using log (inhibitor) vs normalized response function in GraphPad Prism.

**Fig. S2. ISG induction by 4HC-conditioned culture medium.** A, B. 4T1 and E0771 cells were treated with 4HC for 72-h under the same conditions as Fig. 1. Data show ISGs were strongly induced in both cell models, as determined by qPCR analysis. C, D. Induction of ISGs in drug-naïve 4T1 and E0771 recipient cells treated for 4-h with 4HC-conditioned cell culture supernatant from the corresponding drug-treated donor cells (as in A, B), followed by a PBS wash and 2 h incubation in fresh culture medium. Gene expression was analyzed by qPCR. In both cell lines, recipient cells showed weaker ISG induction than in cells directly exposed to 4HC. Data points: mean +/- SD values for n = 2-3 replicates representative of two independent experiments.

### Fig. S3. Verification of anti-IFNAR-1 antibody inhibitory activity.

4T1 cells (A) and E0771 cells (B) were treated with 28, 83 or 250 U/mL of mouse recombinant IFN $\beta$  for 4-h, with or without 10  $\mu$ g/mL IFNAR-1 antibody and harvested 2 h later. IFN $\beta$  induced similar ISG responses in both cell lines at all concentrations. Anti-IFNAR1 antibody blocked ISG induction > 90%, except at the highest concentration IFN $\beta$  for the ISG *Oas1*, where the antibody concentration may not have been sufficient to effect complete inhibition. Data presented as mean +/- SD with n=3 replicates. Percent expression was calculated using the formula  $((x \pm SD) - (z \pm SD)) / ((y \pm SD) - (z \pm SD))$ , where x = antibody + IFN $\beta$  treatment gene expression, z = untreated gene expression and y = IFN $\beta$  treatment gene expression.

### Fig. S4. E0771 tumor growth curves and qPCR analysis of metronomic-CPA *in vivo* dose response data.

A. E0771 tumors implanted in mice were treated with 90, 110 or 130 mg/kg CPA every 6 days. All three CPA dosages induced extensive tumor regression by day 12. Data shown are mean +/- SEM values for n = 11 tumors for the placebo group, n = 9 tumors for the 90 mg/kg CPA group, n = 10 tumors for the 110 mg/kg CPA group, and n = 10 tumors for the 130 mg/kg CPA group. Tumor volumes were normalized to 100 percent of the volume on Day 0 (first day of CPA treatment). B. ISG induction was < 2-fold at all CPA doses. C. Immune cell marker genes showed very similar fold-change values at each CPA dose, except for CD8a, which showed dose-dependent induction. Significance was determined by 2-way ANOVA: \*, p < 0.05; \*\*, p < 0.01; \*\*\*, p < 0.001; \*\*\*\*, p < 0.0001.

### Fig. S5. Representative FACS analysis of blood from CPA-treated mice, with and without anti-CD8a antibody treatment.

Data representative of 2 individual mice. A. 20  $\mu$ L of mouse tail vein blood was prepared for FACS analysis of circulating CD8 T-cells. Events were selected based on general size parameters of forward-scatter (FSC-H) and side-scatter (SSC-H) to exclude overly large and small events. B. Live cells were selected by excluding events with propidium iodide signal. C. CD8 T-cells were selected by excluding events that lacked the APC signal from the APC-labeled anti-CD8a antibody used in sample preparation. D. CD8 T-cell percentages were calculated by dividing the CD8+ events by the total number of live events. Mouse blood from the CPA + anti-CD8a group was devoid of CD8 T-cells, in contrast to blood from the CPA + IgG control group.

### Fig. S6. Circulating CD8 T-cells for CPA-treated mice with and without anti-CD8a antibody.

FACS analysis of blood from the mice shown in Fig. 7 that were given CPA + anti-CD8a antibody showed complete depletion of circulating CD8 T-cells after 2 antibody doses. The depletion was maintained for many weeks after antibody treatment (blue arrow heads below x-axis) was halted. CD8 T-cells levels were not detected in the CPA + anti-CD8a group at any of the 8 time points

analyzed (small triangles superimposed on the x-axis, at time points from day 1 through day 50). Data shown are group mean values  $\pm$  SEM for  $n = 4$  mice in each group.

**Fig. S7. FACS analysis of blood and tumors from mice given metronomic CPA treatment with and without anti-IFNAR1 antibody. A.** FACS analysis on treatment day 12 of tumor infiltrating CD8 T-cells from the mice shown in Fig. 8. Anti-IFNAR1 antibody treatment almost completely blocked CD8 T-cells from infiltrating the tumors. Data shown are mean  $\pm$  SEM values for  $n = 4$  for placebo + IgG,  $n = 5$  for CPA + IgG, and  $n = 6$  for CPA + Anti-IFNAR1. **B.** FACS analysis of circulating CD8 T-cells from Fig. 8 mice. Circulating CD8 T-cells were not significantly different in the CPA + Anti-IFNAR1 group versus the CPA + IgG group. Data based on  $n = 3$  for each group.

**Fig. S8. Gene-specific qPCR primer sequences, amplicon length and % GC content**

**A. 4T1**

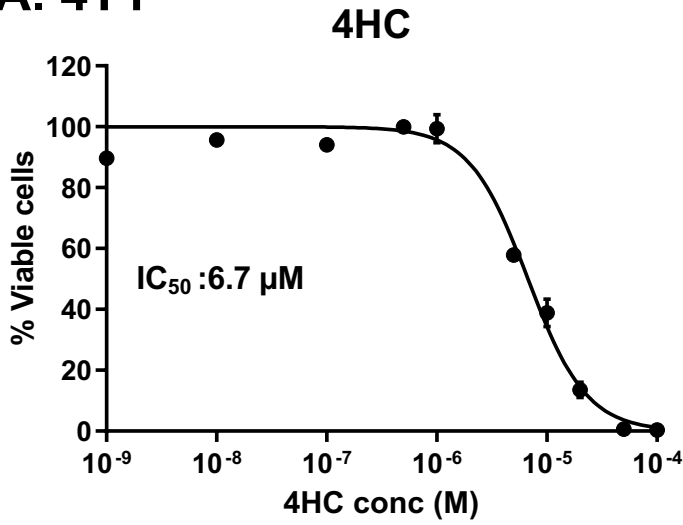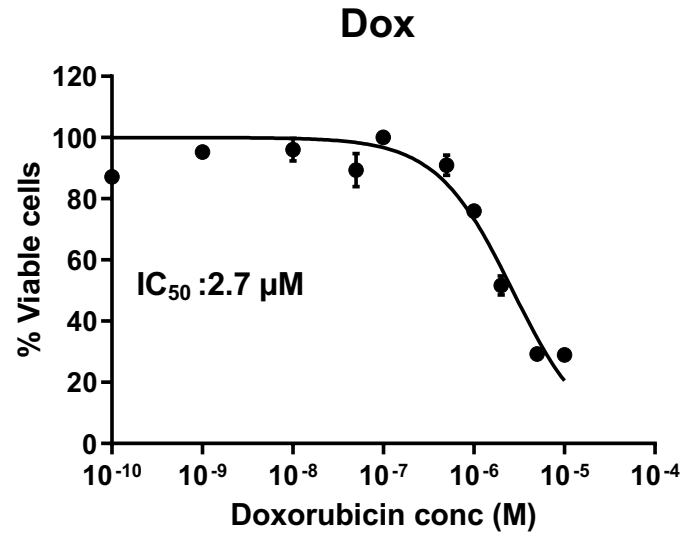

**B. E0771**

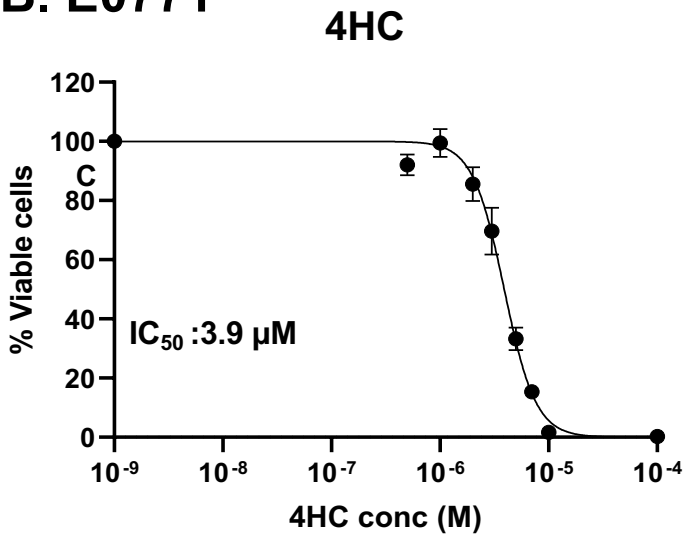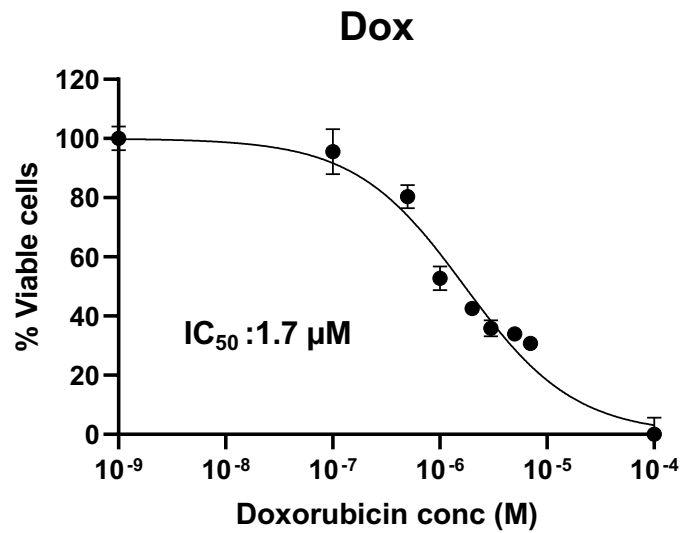

**C. B16F10**

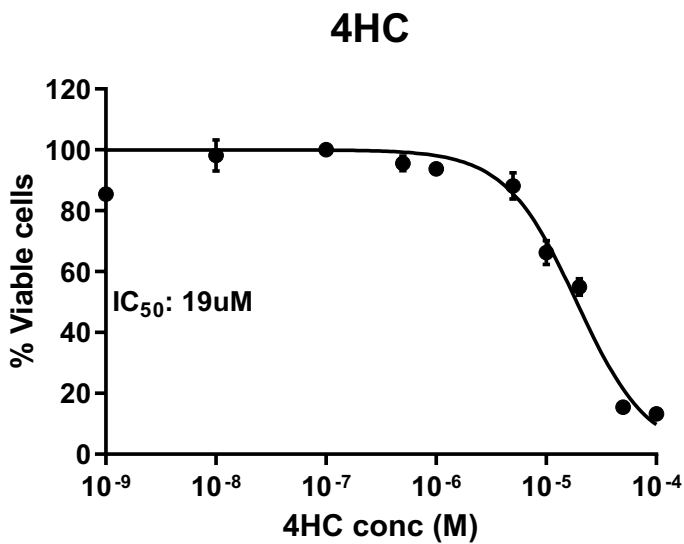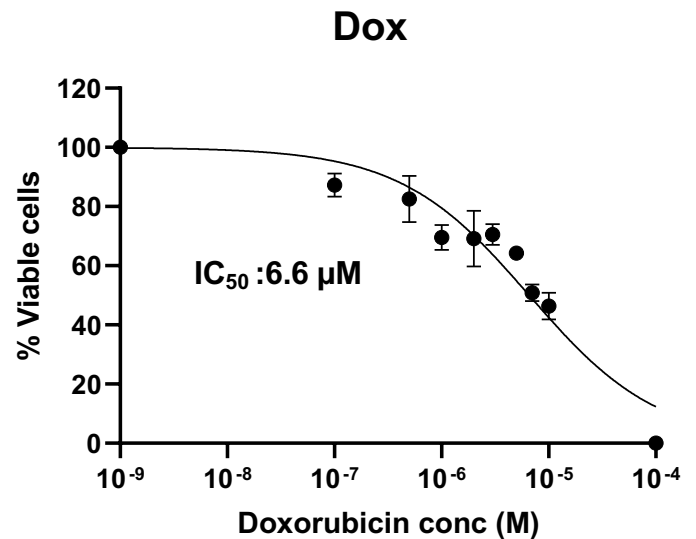

**Fig. S2: ISG induction by 4HC-conditioned media**

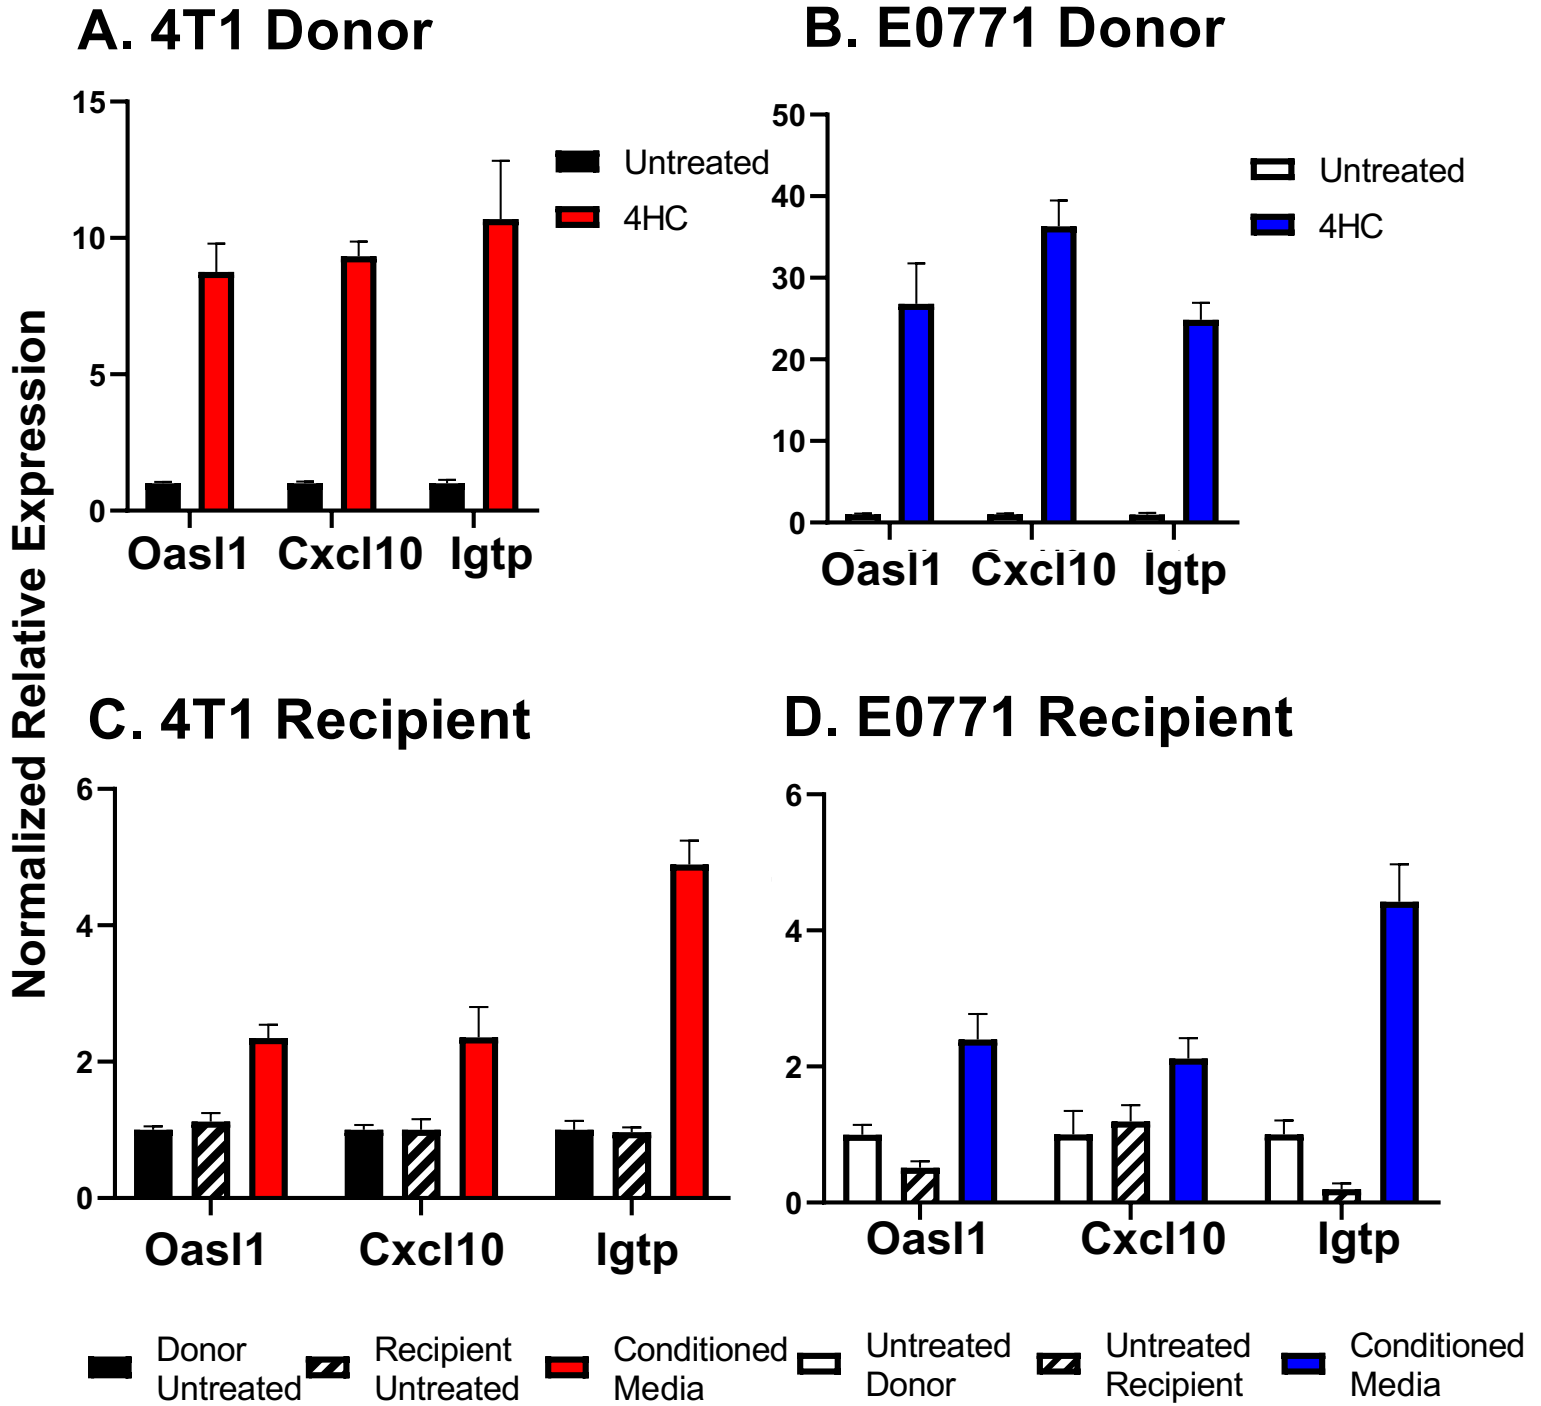

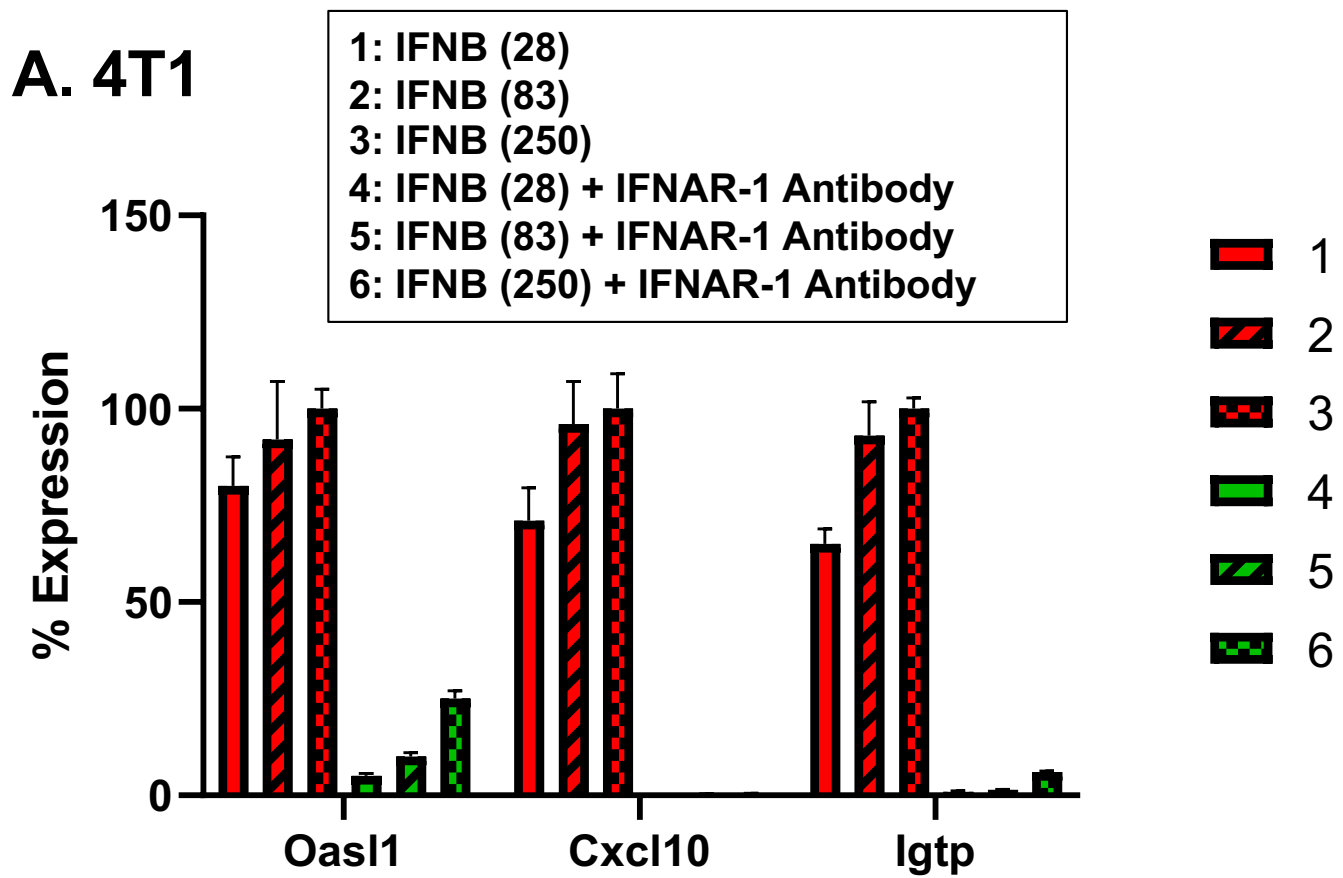

### B. E0771

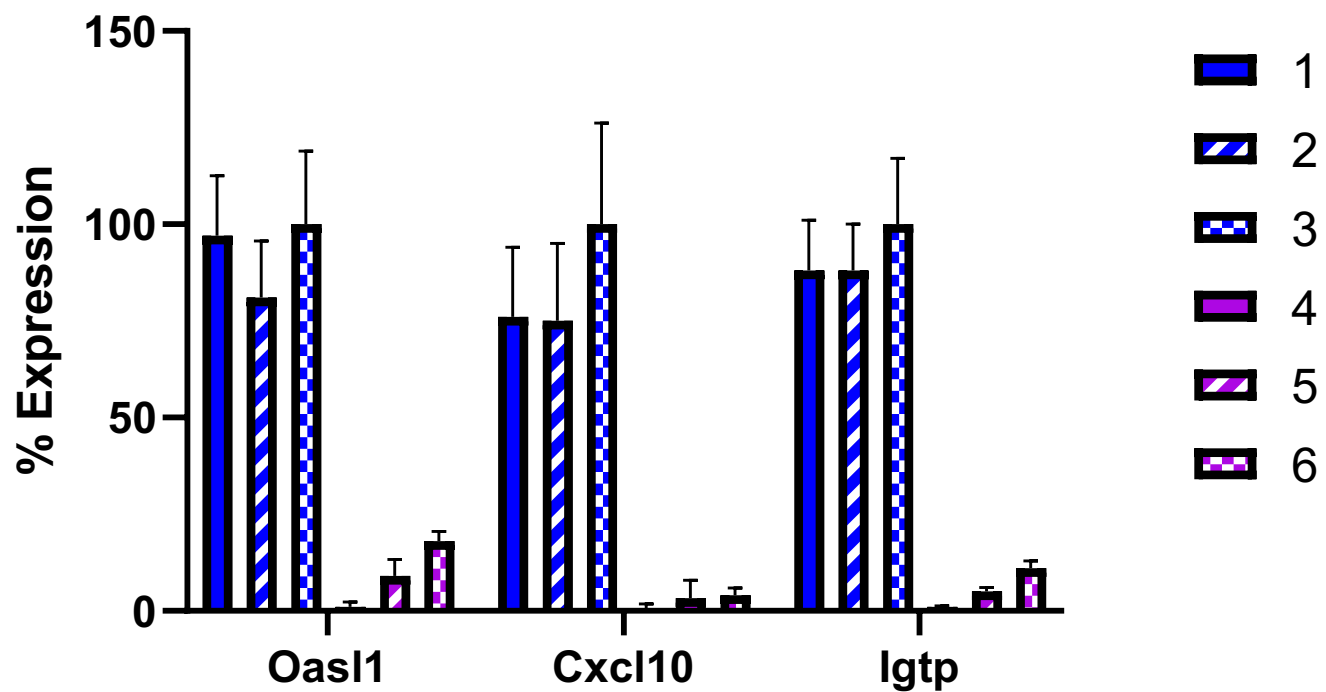

### A. E0771 Tumor growth

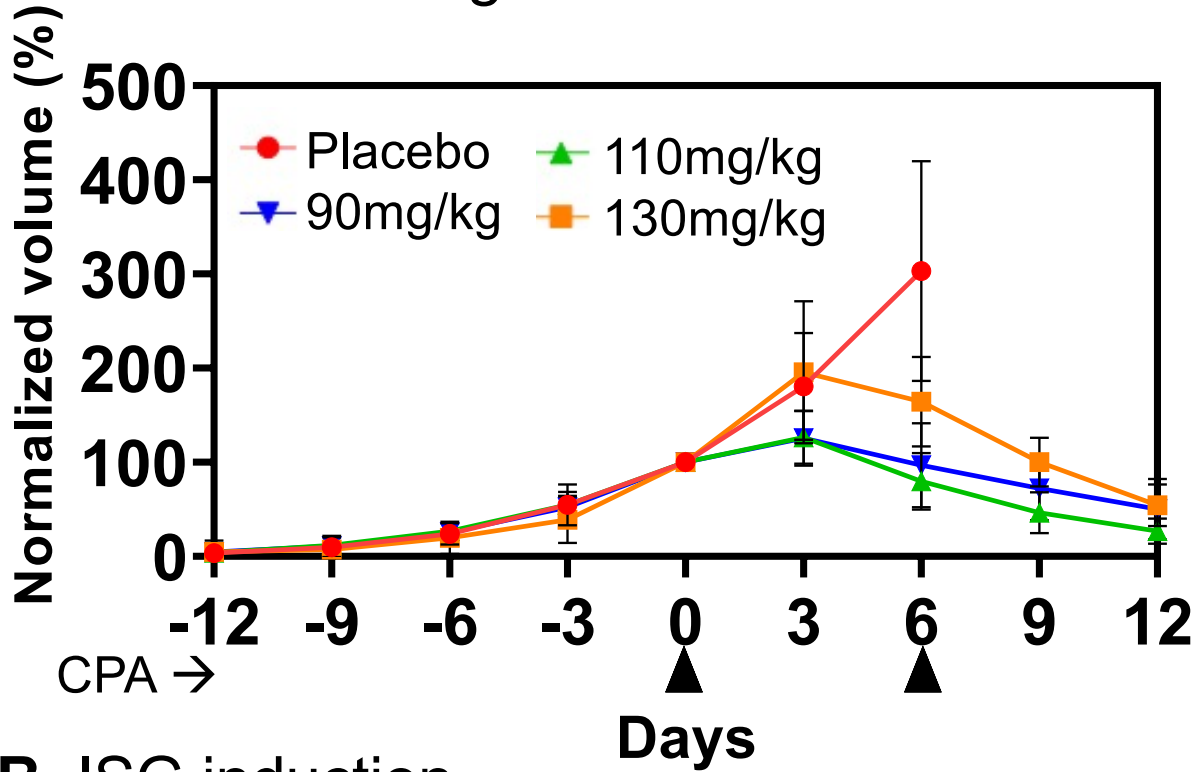

### B. ISG induction

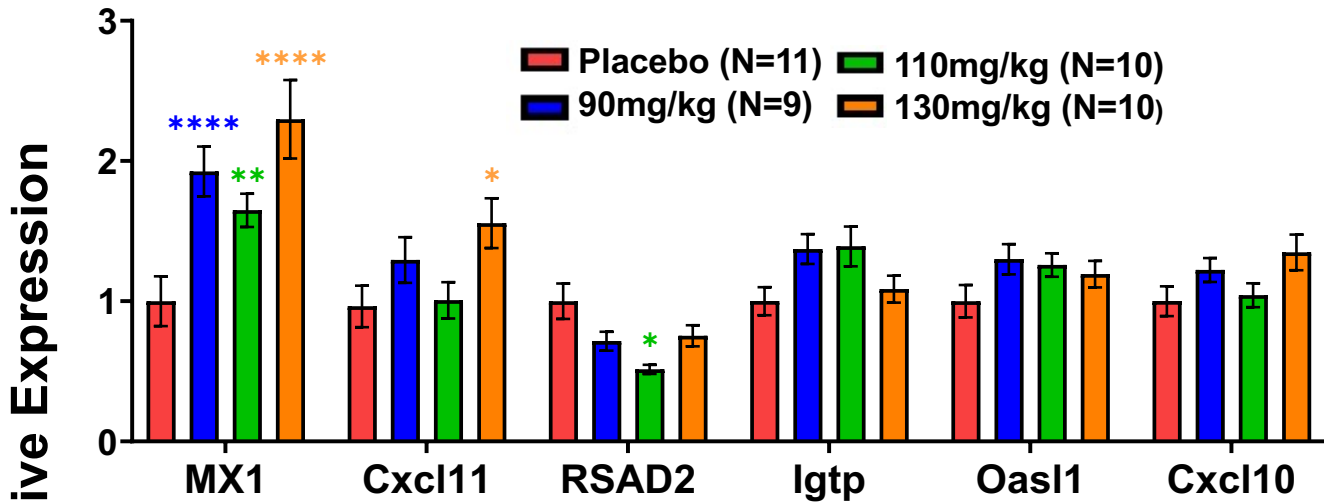

### C. Immune cell markers

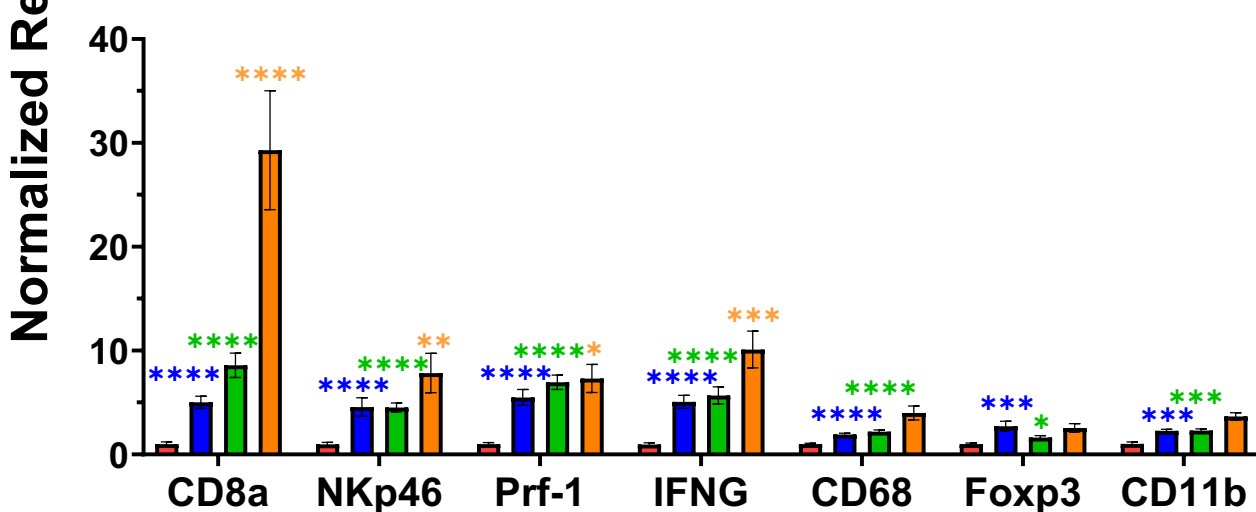



## Fig. S5: Representative Anti-CD8a FACS Data

### A. Size Selection

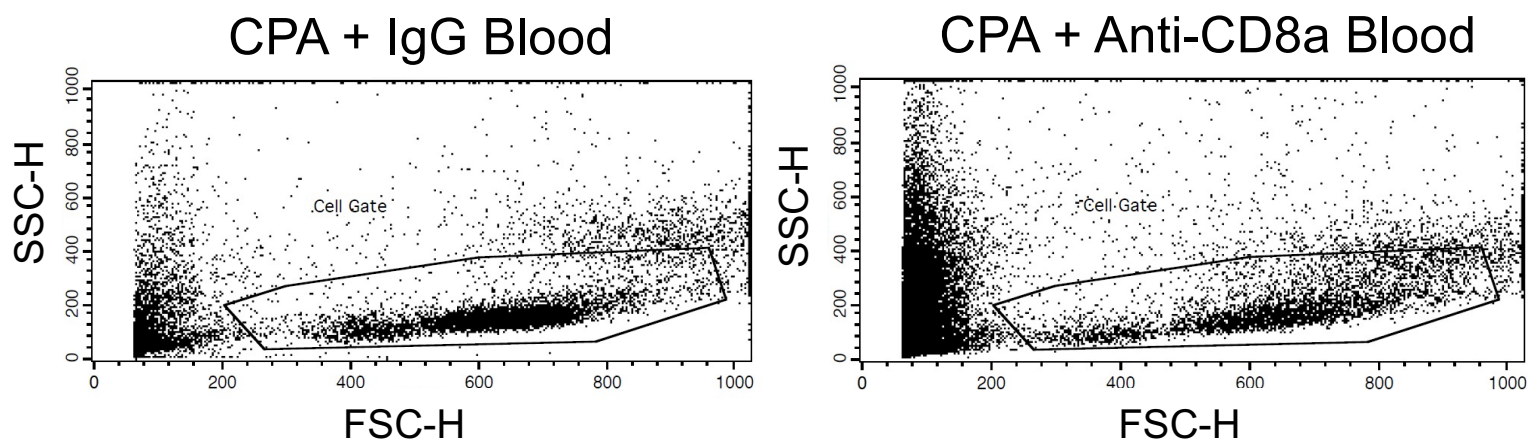

### B. Dead Cell Exclusion:

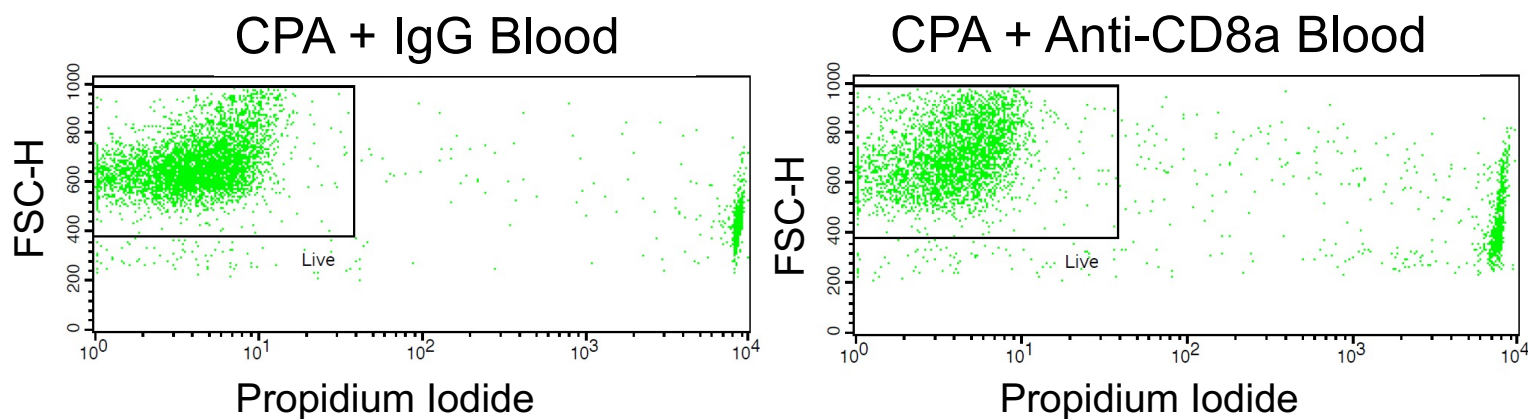

### C. CD8a Selection:

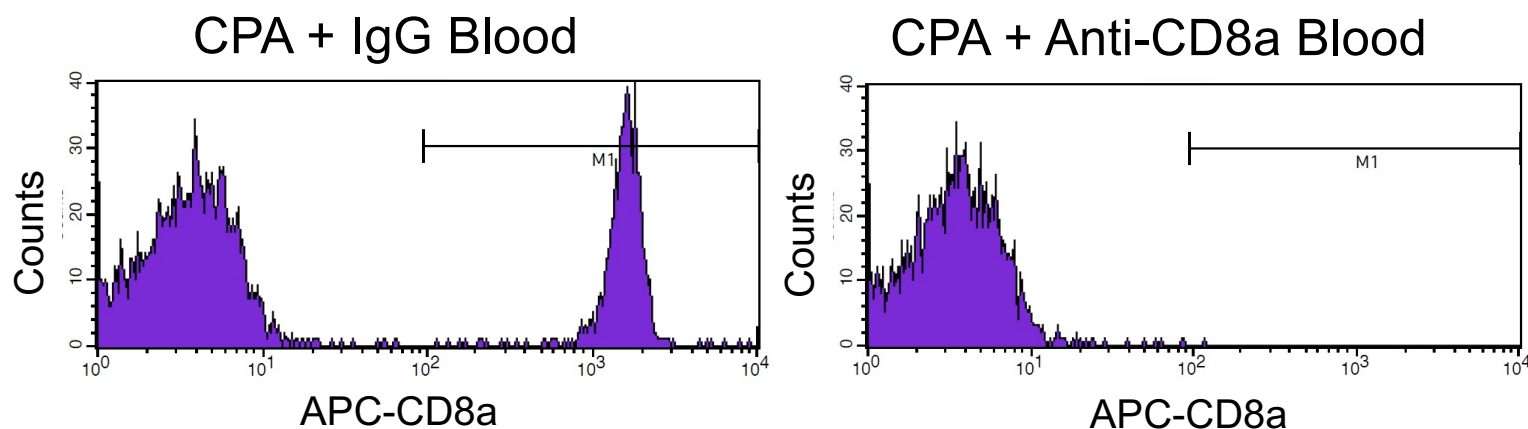

### D. Histogram Statistics:

CPA + IgG Blood

CPA + Anti-CD8a Blood

| Marker | Left, Right | Events | % Gated |
|--------|-------------|--------|---------|
| All    | 1, 9910     | 5792   | 100.00  |
| M1     | 95, 9910    | 1617   | 27.92   |

| Marker | Left, Right | Events | % Gated |
|--------|-------------|--------|---------|
| All    | 1, 9910     | 4115   | 100.00  |
| M1     | 95, 9910    | 1      | 0.02    |

**Fig. S6: FACS Analysis during Metro-CPA + Anti-CD8a Antibody Treatment**

## Circulating CD8 T-cells

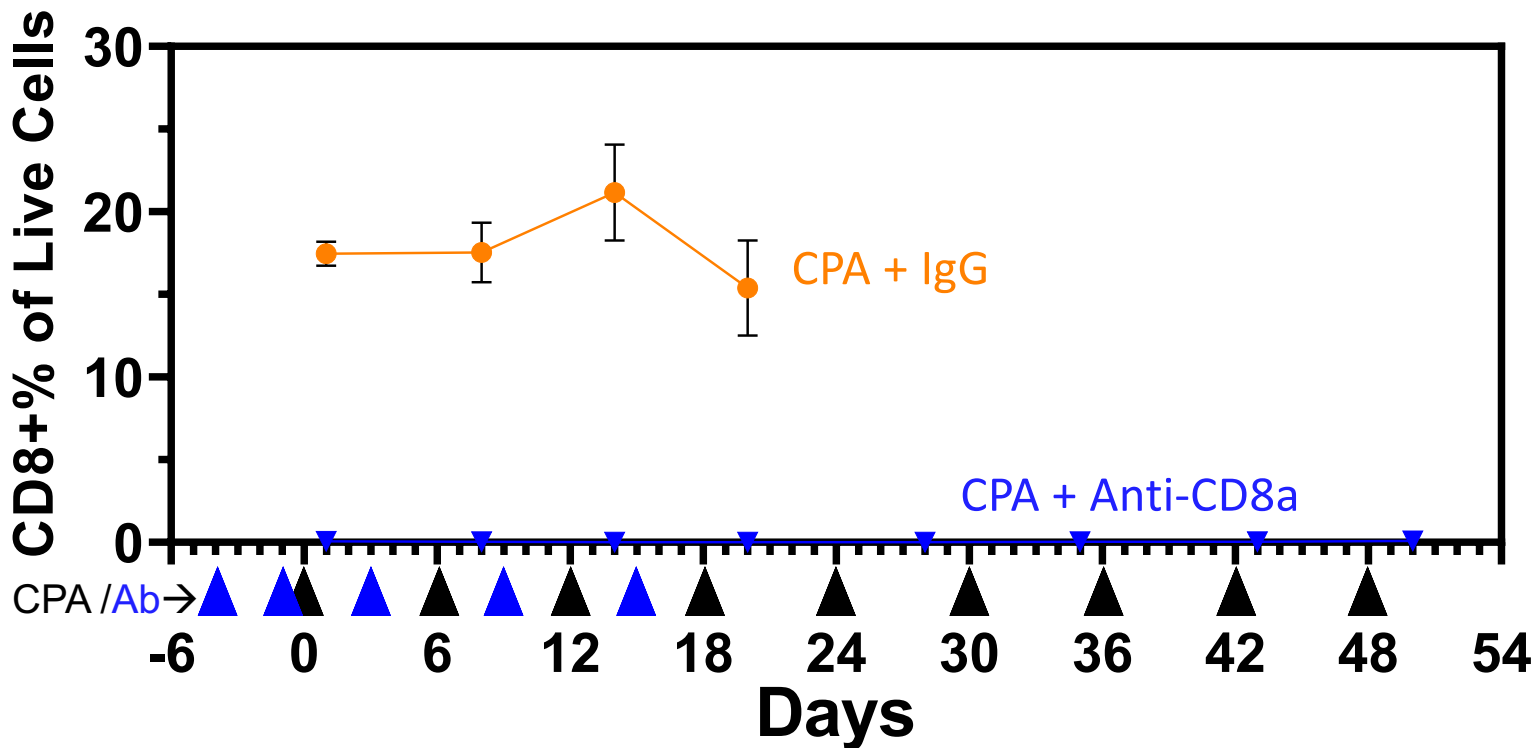

## Figure S7: FACS analysis during metro-CPA + Anti-IFNAR1 Treatment

### A. Tumor-infiltrating CD8 T-cells

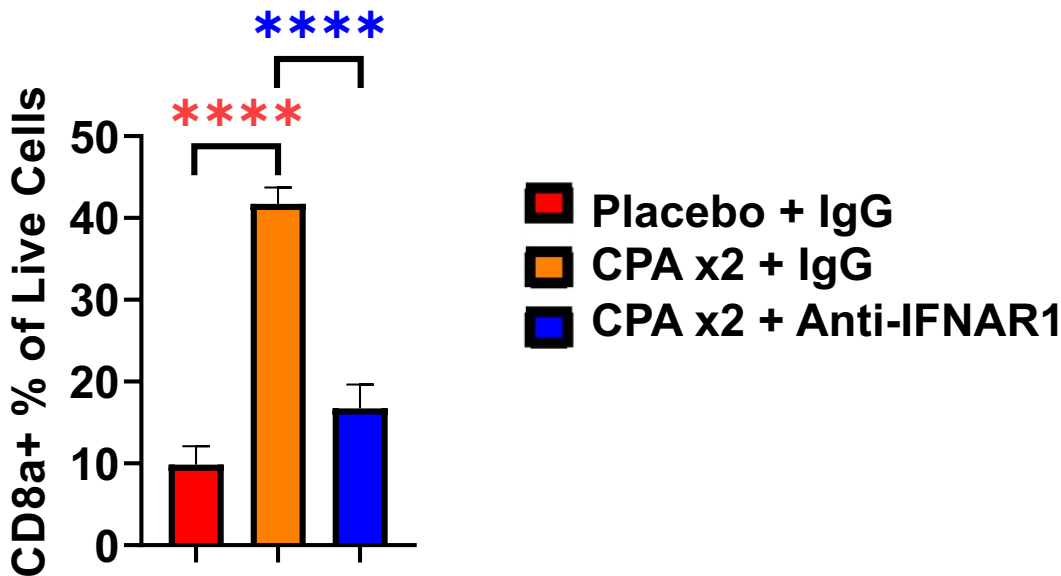

### B. Circulating CD8 T-cells

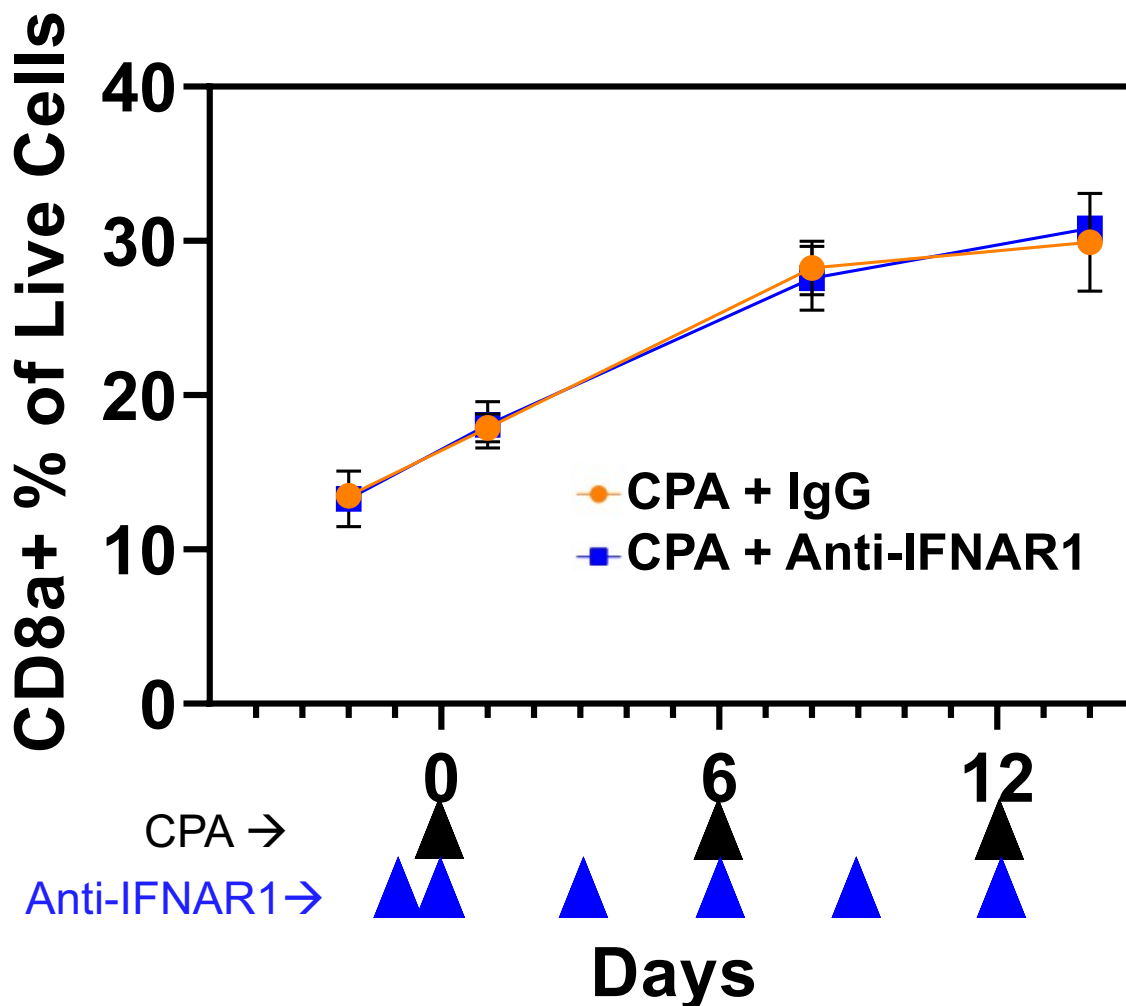

## Fig. S8. Gene-specific qPCR primer sequences, amplicon length and % GC content

| ON#  | Gene         | Direction | Sequence (5'-3')           | Amplicon Length (bp) | G:C Content (%) |
|------|--------------|-----------|----------------------------|----------------------|-----------------|
| 6987 | Mx1          | Forward   | AGAGCTCTGTGCTGGAAGCAC      | 93                   | 57              |
| 6988 |              | Reverse   | GCTTCCTCAATTTCCAGCACCA     | 93                   | 48              |
| 7484 | Oasl1        | Forward   | GATGTGCGCGTGCTCAAG         | 80                   | 61              |
| 7485 |              | Reverse   | CACGGTGCCATTCCCAAA         | 80                   | 56              |
| 3373 | Cxcl10       | Forward   | ACCATGAACCCAAGTGCTGCC      | 140                  | 57              |
| 3374 |              | Reverse   | CTATGGCCCTCATTCTCACTGGCC   | 140                  | 58              |
| 6955 | Igtf         | Forward   | CTGAGCCTGGATTGCAGCTT       | 81                   | 55              |
| 6956 |              | Reverse   | TGGGTCTGCTCTAGGCCTTG       | 81                   | 60              |
| 8065 | RSAD2        | Forward   | GCCCAAGTATTCACCCCTGT       | 133                  | 55              |
| 8066 |              | Reverse   | AAGACATCCTTCGTGCTGCC       | 133                  | 55              |
| 7936 | Cxcl11       | Forward   | ACGGCTGCGACAAAGTTGAA       | 95                   | 50              |
| 7937 |              | Reverse   | GGAGGGCTCACAGTCAGACG       | 95                   | 65              |
| 4255 | CD8 $\alpha$ | Forward   | GAAGATTCTGGGGCAGCATGGCAAAG | 81                   | 54              |
| 4256 |              | Reverse   | TTGGAATCAAAACGATCAA        | 81                   | 30              |
| 4668 | Nkp46        | Forward   | GCAACCCCTGAAACTGGTA        | 79                   | 55              |
| 4669 |              | Reverse   | AAGTTACCTCAGGCTGTGGATA     | 79                   | 48              |
| 3427 | CD68         | Forward   | GCCCGAGTACAGTCTACCTGG      | 97                   | 62              |
| 3428 |              | Reverse   | GCCCGAGTACAGTCTACCTGG      | 97                   | 45              |
| 4253 | Foxp3        | Forward   | GCCTTCAGACGAGACTTGAA       | 99                   | 52              |
| 4254 |              | Reverse   | CTGGCCTAGGGTTGGGCATT       | 99                   | 60              |
| 4261 | CD11b        | Forward   | CCAAGAGAATGCAAAAGGCTTT     | 74                   | 41              |
| 4262 |              | Reverse   | GGGGGGCTGCAACAACCACA       | 74                   | 65              |
| 3429 | IFNG         | Forward   | TCTTCAGCAACAGCAAGGCG       | 79                   | 55              |
| 3430 |              | Reverse   | CGCTGGACCTGTGGTTGTTG       | 79                   | 62              |
| 3565 | Prf-1        | Forward   | GTACAACCTTAATAGCGACACAGTA  | 80                   | 36              |
| 3566 |              | Reverse   | AGTCAAGGTGGAGTGGAGGT       | 80                   | 55              |
| 3561 | GZMB         | Forward   | TGTCTCTGGCCTCCAGGACAA      | 110                  | 57              |
| 3562 |              | Reverse   | CTCAGGCTGCTGATCCTTGATCGA   | 110                  | 54              |
